# Supplementary material for: Atypical chemoreceptor arrays accommodate high membrane curvature
Source: Nat Commun. 2020 Nov 13;11:5763. doi: 10.1038/s41467-020-19628-6 (PMC7666581; doi:10.1038/s41467-020-19628-6)
Supplement: Supplementary file 6 — Source Data [file 41467_2020_19628_MOESM6_ESM.xlsx]

## Sheet: Fig. 4B
SEC-MALS of CheA + CheW-Rlike				SDS-PAGE gel
time (min)	Light Scattering	dRI	Molecular Weight
-0.466284	2.32899e-05
-0.456456	2.10773e-05
-0.426973	1.69868e-05
-0.39749	2.63407e-05
-0.363093	2.1797e-05
-0.333609	5.70844e-05
-0.299212	5.09035e-05
-0.269729	5.26092e-05
-0.235332	4.87173e-05
-0.205849	3.99151e-05
-0.171452	2.97894e-05
-0.141968	3.60768e-05
-0.107571	5.18193e-05					Lane	Sample
-0.0780881	6.68818e-05					1	Protein ladder
-0.043691	6.78317e-05					2	CheA + CheW
-0.0142078	6.51679e-05					3	CheA + CheW
0.0201893	7.46273e-05					4	CheA + CheW
0.0496726	7.30092e-05					5	CheA + CheW
0.0840696	7.81648e-05					6	CheA + CheW
0.113553	7.98015e-05					7	Protein ladder
0.143036	7.23631e-05
0.177433	6.06784e-05
0.206916	6.19858e-05
0.241314	5.65868e-05
0.270797	4.40067e-05
0.305194	4.19755e-05
0.334677	3.87421e-05
0.369074	3.84677e-05
0.398557	2.81085e-05
0.432954	1.68362e-05
0.462438	2.01864e-05
0.496835	6.2858e-05
0.526318	7.12652e-05
0.560715	7.3363e-05
0.590198	7.6739e-05
0.624595	9.93119e-05
0.654079	8.98675e-05
0.683562	9.57003e-05
0.717959	0.000102467
0.747442	0.000109708
0.781839	0.000109927
0.811322	0.000106645
0.84572	0.000112687
0.875203	0.000102408
0.9096	9.1057e-05
0.939083	0.00010124
0.97348	0.000102597
1.00296	9.34372e-05
1.03736	8.702e-05
1.06684	9.25371e-05
1.10124	7.67593e-05
1.13072	8.22459e-05
1.16512	8.69504e-05
1.1946	9.72862e-05
1.22409	8.80352e-05
1.25848	7.61026e-05
1.28797	8.1386e-05
1.32237	8.07817e-05
1.35185	6.73941e-05
1.38625	6.19458e-05
1.41573	9.86773e-05
1.45013	0.000105406
1.47961	0.000127763
1.51401	0.000116498
1.54349	0.000119354
1.57789	0.000129245
1.60737	0.000124706
1.64177	0.000111539
1.67125	0.0001047
1.70073	0.000101815
1.73513	9.45208e-05
1.76461	7.52461e-05
1.79901	6.66292e-05
1.82849	7.12865e-05
1.86289	4.89297e-05
1.89237	5.38502e-05
1.92677	5.3328e-05
1.95625	6.11134e-05
1.99065	7.8943e-05
2.02013	7.51543e-05
2.05453	9.85921e-05
2.08401	9.69748e-05
2.11841	8.30993e-05
2.1479	8.32601e-05
2.18229	0.000103706
2.21178	0.000106688
2.24126	8.90606e-05
2.27566	7.55095e-05
2.30514	6.36702e-05
2.33954	5.09895e-05
2.36902	4.79079e-05
2.40342	4.16418e-05
2.4329	5.73953e-05
2.4673	4.9152e-05
2.49678	4.27831e-05
2.53118	5.78487e-05
2.56066	8.45943e-05
2.59506	7.31562e-05
2.62454	6.44197e-05
2.65894	4.96614e-05
2.68842	5.47557e-05
2.72282	0.000117969
2.7523	0.000100888
2.78178	9.61289e-05
2.81618	9.25637e-05
2.84566	7.99292e-05
2.88006	7.90333e-05
2.90955	7.41402e-05
2.94394	7.01857e-05
2.97343	6.8982e-05
3.00782	6.89791e-05
3.03731	7.37097e-05
3.0717	7.29109e-05
3.10119	5.37354e-05
3.13558	6.55407e-05
3.16507	9.63439e-05
3.19946	8.58276e-05
3.22895	7.05387e-05
3.26334	5.32517e-05
3.29283	6.01765e-05
3.32231	6.67738e-05
3.35671	4.96761e-05
3.38619	3.88385e-05
3.42059	4.664e-05
3.45007	2.41661e-05
3.48447	1.42994e-05
3.51395	8.65063e-06
3.54835	8.57129e-06
3.57783	5.85968e-06
3.61223	-7.21623e-06
3.64171	1.71228e-05
3.67611	1.63734e-05
3.70559	1.23429e-05
3.73999	7.79287e-06
3.76947	1.63612e-05
3.80387	2.86588e-05
3.83335	2.45454e-05
3.86284	2.46339e-05
3.89723	2.53993e-05
3.92672	1.40149e-05
3.96111	7.78847e-06
3.9906	1.9825e-05
4.02499	4.04251e-06
4.05448	6.48516e-06
4.08887	1.58416e-05
4.11836	2.13884e-05
4.15275	2.05714e-05
4.18224	3.0376e-05
4.21663	2.75996e-05
4.24612	2.96551e-05
4.28052	4.23655e-05
4.31	3.44768e-05
4.33948	3.36845e-05
4.37388	3.44769e-05
4.40336	3.07481e-05
4.43776	3.18467e-05
4.46724	3.44784e-05
4.50164	3.25428e-05
4.53112	5.95217e-05
4.56552	7.67021e-05
4.595	6.41674e-05
4.6294	6.87032e-05
4.65888	9.6684e-05
4.69328	0.000110413
4.72276	8.93043e-05
4.75716	7.16501e-05
4.78664	6.17086e-05
4.82104	4.40133e-05
4.85052	5.51654e-05
4.88001	5.18756e-05
4.9144	4.17911e-05
4.94389	3.3595e-05
4.97828	1.59201e-05
5.00777	8.41157e-06
5.04217	1.11511e-05
5.07165	2.04167e-05
5.10605	4.90364e-05
5.13553	5.31339e-05
5.16993	6.91397e-05
5.19941	6.00154e-05
5.23381	4.93942e-05
5.26329	7.36688e-05
5.29769	7.47826e-05
5.32717	9.02092e-05
5.36157	8.38907e-05
5.39105	8.91952e-05
5.42053	6.67964e-05
5.45493	6.71824e-05
5.48441	6.14293e-05
5.51881	8.30673e-05
5.54829	6.32496e-05
5.58269	5.14265e-05
5.61217	3.877e-05
5.64657	3.58803e-05
5.67605	3.53883e-05
5.71045	4.37309e-05
5.73993	3.77593e-05
5.77433	2.64421e-05
5.80382	2.76935e-05
5.83821	3.00389e-05
5.8677	7.54605e-05
5.90209	9.98831e-05
5.93158	0.00015588
5.96106	0.000205045
5.99546	0.000222812
6.02494	0.000269996
6.05934	0.000346053
6.08882	0.000431352
6.12322	0.000573359
6.1527	0.000751321
6.1871	0.00100103
6.21658	0.00126675
6.25098	0.00162989
6.28046	0.00195897
6.31486	0.00243205
6.32469	0.00257867
6.34434	0.0029468
6.37874	0.00362458
6.40822	0.00425348
6.44262	0.00502872
6.45736	0.0053696
6.4721	0.00571352
6.50158	0.00640931
6.53598	0.00725234
6.56546	0.00803585
6.57529	0.00829417
6.59986	0.00894128
6.62935	0.00973253
6.66374	0.0106365
6.6834	0.011149
6.69323	0.0113997
6.72762	0.0123125
6.75711	0.0130674
6.7915	0.0139325
6.82099	0.0146921
6.85538	0.0155366
6.88487	0.0162905
6.90452	0.0168152
6.91926	0.0171957
6.94875	0.0179454
6.97823	0.0187931
7.00771	0.0196954
7.01263	0.0198486
7.04211	0.0208832
7.07651	0.0223325
7.08142	0.0225671
7.10599	0.0238184
7.13547	0.0255583
7.14039	0.0258858
7.16987	0.0280079
7.17478	0.028381
7.20427	0.0308324
7.20918	0.0312725
7.23375	0.0336289
7.23867	0.0341133
7.26323	0.0366899
7.26815	0.0372296
7.29272	0.0400295
7.29763	0.0406079
7.31729	0.0429628
7.33203	0.0447864
7.33694	0.0453972
7.36151	0.0485228
7.38117	0.0510216
7.39591	0.0528918
7.40574	0.0541369
7.42539	0.0566354
7.44996	0.0596781
7.45979	0.0608852
7.47453	0.0626732
7.48927	0.0644139
7.4991	0.0655631
7.51876	0.0678106
7.52367	0.0683671
7.54824	0.0710683
7.55315	0.0715968
7.57281	0.0736936
7.58264	0.0747028
7.60229	0.0767013
7.61703	0.0781564
7.63177	0.0795871
7.64652	0.0809942
7.66126	0.0823537
7.68091	0.0841262
7.69566	0.0854075
7.7104	0.0866541
7.73005	0.088296
7.74479	0.0895098
7.76445	0.0910805
7.77428	0.091864
7.79885	0.0937424
7.80867	0.0944781
7.83816	0.0966397
7.87255	0.0990407
7.87747	0.0993721
7.90204	0.100998
7.92169	0.102245
7.93643	0.103153
7.96592	0.104902
7.97083	0.105181
8.00032	0.106792
8.02488	0.108062
8.0298	0.108307
8.05928	0.109771
8.07894	0.110668
8.09368	0.111315
8.12316	0.112604
8.14773	0.113686
8.15756	0.114096
8.18704	0.115398
8.21161	0.116507
8.22144	0.116976
8.25092	0.11853
8.26566	0.119404
8.28532	0.120749
8.30498	0.122344
8.3148	0.123268
8.33446	0.125417
8.3492	0.127386
8.35411	0.128141
8.36886	0.130664
8.37868	0.132617
8.3836	0.13369
8.39834	0.137321
8.40817	0.140122
8.41308	0.141652
8.41799	0.143267
8.42291	0.144979
8.43274	0.148732
8.43765	0.150779
8.44256	0.152947
8.44748	0.155211
8.45239	0.157594
8.45731	0.160111
8.46222	0.162769
8.46713	0.165575
8.47205	0.168522
8.47696	0.171596
8.48187	0.174824
8.48679	0.178234
8.4917	0.181772
8.49662	0.185474
8.50153	0.189348
8.50644	0.193396
8.51136	0.197617
8.51627	0.202045
8.52119	0.206703
8.5261	0.211479
8.53101	0.216431
8.53593	0.221539
8.54084	0.226838
8.54575	0.23233
8.55067	0.238012
8.55558	0.243894
8.5605	0.249967
8.56541	0.256232
8.57032	0.262691
8.57524	0.269362
8.58015	0.276232
8.58507	0.283265
8.58998	0.290504
8.59489	0.297929
8.59981	0.305536
8.60472	0.313359
8.60964	0.321363
8.61455	0.329503
8.61946	0.337908
8.62438	0.346384
8.62929	0.355024
8.6342	0.363826
8.63912	0.372749
8.64403	0.381831
8.64895	0.391074
8.65386	0.400456
8.65877	0.409982
8.66369	0.419669
8.6686	0.429436
8.67352	0.439288
8.67843	0.449247
8.68334	0.459288
8.68826	0.469441
8.69317	0.479641
8.69808	0.489927
8.703	0.500278
8.70791	0.510697
8.71283	0.521171
8.71774	0.531683
8.72265	0.542214
8.72757	0.552786
8.73248	0.563375
8.7374	0.573961
8.74231	0.584552
8.74722	0.595134
8.75214	0.605697
8.75705	0.61625
8.76197	0.62676
8.76688	0.637244
8.77179	0.647675
8.77671	0.658042
8.78162	0.668341
8.78653	0.678575
8.79145	0.68874
8.79636	0.698815
8.80128	0.708811
8.80619	0.718712
8.8111	0.728507
8.81602	0.738192
8.82093	0.747784
8.82585	0.757251
8.83076	0.766574
8.83567	0.775773
8.84059	0.784842
8.8455	0.793756
8.85041	0.802518
8.85533	0.81113
8.86024	0.819579
8.86516	0.827857
8.87007	0.835967
8.87498	0.843907
8.8799	0.851679
8.88481	0.859285
8.88973	0.866711
8.89464	0.873945
8.89955	0.880993
8.90447	0.887841
8.90938	0.89448
8.9143	0.900933
8.91921	0.907179
8.92412	0.913234
8.92904	0.919101
8.93395	0.924753
8.93886	0.930201
8.94378	0.935442
8.94869	0.940492
8.95361	0.945329
8.95852	0.949939
8.96343	0.954324
8.96835	0.958508
8.97326	0.962495
8.97818	0.966262
8.98309	0.969821
8.988	0.973194
8.99292	0.976352
8.99783	0.979355
9.00274	0.982127
9.00766	0.984693
9.01749	0.989189
9.0224	0.991119
9.03223	0.994424
9.03714	0.995772
9.04697	0.997933
9.05188	0.998728
9.08137	0.999558
9.09119	0.998459
9.10594	0.995621
9.11085	0.994367
9.12068	0.991343
9.12559	0.989588
9.13542	0.985618
9.14033	0.983415
9.14525	0.981116
9.15507	0.976135
9.15999	0.973415
9.1649	0.970581
9.16982	0.967615
9.17473	0.964529
9.17964	0.961366
9.18456	0.958048
9.18947	0.954607
9.19439	0.951058
9.1993	0.947408
9.20421	0.94365
9.20913	0.9398
9.21404	0.935864
9.21896	0.931827
9.22387	0.927686
9.22878	0.923465
9.2337	0.919165
9.23861	0.914769
9.24352	0.910289
9.24844	0.905729
9.25335	0.901108
9.25827	0.89641
9.26318	0.891644
9.26809	0.886809
9.27301	0.881922
9.27792	0.876963
9.28284	0.871951
9.28775	0.866881
9.29266	0.861744
9.29758	0.856559
9.30249	0.851336
9.3074	0.846063
9.31232	0.840782
9.31723	0.835447
9.32215	0.830063
9.32706	0.824619
9.33197	0.819147
9.33689	0.813647
9.3418	0.808112
9.34672	0.802535
9.35163	0.796932
9.35654	0.791301
9.36146	0.785645
9.36637	0.779985
9.37129	0.774292
9.3762	0.768587
9.38111	0.762883
9.38603	0.757145
9.39094	0.751394
9.39585	0.745631
9.40077	0.739858
9.40568	0.734071
9.4106	0.728276
9.41551	0.722495
9.42042	0.716701
9.42534	0.71091
9.43025	0.705133
9.43517	0.699345
9.44008	0.693564
9.44499	0.687782
9.44991	0.682025
9.45482	0.67629
9.45973	0.670534
9.46465	0.664785
9.46956	0.659056
9.47448	0.65335
9.47939	0.647642
9.4843	0.641945
9.48922	0.636274
9.49413	0.630618
9.49905	0.624995
9.50396	0.619391
9.50887	0.613831
9.51379	0.608264
9.5187	0.602711
9.52362	0.597185
9.52853	0.591682
9.53344	0.586203
9.53836	0.580758
9.54327	0.575346
9.54818	0.569952
9.5531	0.564586
9.55801	0.559251
9.56293	0.553972
9.56784	0.54871
9.57275	0.543467
9.57767	0.53827
9.58258	0.533095
9.5875	0.527951
9.59241	0.522839
9.59732	0.517762
9.60224	0.512719
9.60715	0.507713
9.61206	0.502753
9.61698	0.497825
9.62189	0.492932
9.62681	0.488067
9.63172	0.48325
9.63663	0.478457
9.64155	0.473705
9.64646	0.469001
9.65138	0.464331
9.65629	0.459692
9.6612	0.455103
9.66612	0.450544
9.67103	0.446049
9.67595	0.441582
9.68086	0.437151
9.68577	0.43276
9.69069	0.428413
9.6956	0.424095
9.70051	0.41982
9.70543	0.415578
9.71034	0.411394
9.71526	0.407228
9.72017	0.403117
9.72508	0.399034
9.73	0.39499
9.73491	0.390988
9.73983	0.38702
9.74474	0.383094
9.74965	0.379229
9.75457	0.375393
9.75948	0.371579
9.76439	0.367802
9.76931	0.364075
9.77422	0.360388
9.77914	0.35672
9.78405	0.353094
9.78896	0.349506
9.79388	0.345963
9.79879	0.342453
9.80371	0.338978
9.80862	0.335539
9.81353	0.332144
9.81845	0.328777
9.82336	0.325459
9.82828	0.322192
9.83319	0.318941
9.8381	0.31573
9.84302	0.312546
9.84793	0.309398
9.85284	0.306286
9.85776	0.303207
9.86267	0.300157
9.86759	0.297142
9.8725	0.294159
9.87741	0.291214
9.88233	0.288303
9.88724	0.285426
9.89216	0.282582
9.89707	0.279764
9.90198	0.276985
9.9069	0.274236
9.91181	0.271525
9.91672	0.268845
9.92164	0.266191
9.92655	0.263565
9.93147	0.260979
9.93638	0.258419
9.94621	0.253374
9.95112	0.250908
9.95604	0.248469
9.96095	0.246058
9.96586	0.243668
9.97078	0.241303
9.98061	0.236666
9.98552	0.234383
9.99043	0.232123
9.99535	0.229898
10.0003	0.227697
10.0052	0.225512
10.0101	0.223356
10.015	0.221233
10.0248	0.217062
10.0297	0.215015
10.0347	0.21298
10.0445	0.208994
10.0494	0.207038
10.0592	0.203179
10.0641	0.201287
10.074	0.19759
10.0789	0.195764
10.0887	0.192178
10.0985	0.188684
10.1035	0.186967
10.1133	0.183586
10.1231	0.180281
10.128	0.17866
10.1378	0.175474
10.1477	0.172356
10.1575	0.169312
10.1673	0.166354
10.1772	0.163443
10.187	0.160594
10.1919	0.159194
10.1968	0.157812
10.2066	0.155093
10.2165	0.152433
10.2214	0.15113
10.2263	0.149839
10.2361	0.147305
10.2509	0.143605
10.2558	0.1424
10.2607	0.14121
10.2705	0.138886
10.2853	0.135472
10.2951	0.133273
10.3098	0.130049
10.3197	0.127942
10.3246	0.126909
10.3344	0.124877
10.3491	0.121911
10.3639	0.119032
10.3786	0.116247
10.3835	0.11534
10.3983	0.112677
10.413	0.110124
10.4278	0.107626
10.4474	0.104414
10.4622	0.102084
10.4769	0.0998338
10.4818	0.0991027
10.5015	0.09623
10.5113	0.0948528
10.5211	0.0934936
10.5408	0.0908314
10.5457	0.0901871
10.5654	0.0876654
10.5752	0.0864334
10.5899	0.0846326
10.6047	0.082896
10.6145	0.081763
10.6391	0.0790226
10.6636	0.0764068
10.6685	0.0758989
10.6931	0.0734585
10.698	0.0729821
10.7226	0.0706642
10.7324	0.0697612
10.757	0.0675683
10.7619	0.0671429
10.7865	0.0650739
10.7963	0.0642722
10.8258	0.061953
10.8602	0.0593561
10.8897	0.0572474
10.8995	0.0565614
10.9241	0.0549108
10.9437	0.0536218
10.9536	0.0529976
10.9879	0.0508524
11.0174	0.0490763
11.0371	0.0479914
11.0518	0.0471516
11.0813	0.0455329
11.0911	0.0450037
11.1157	0.0437274
11.1452	0.0422483
11.1796	0.0405804
11.2042	0.0394418
11.2091	0.0392216
11.2386	0.0379313
11.273	0.0364869
11.3024	0.0352949
11.3368	0.0339895
11.3417	0.0338063
11.3663	0.0329139
11.4007	0.0317324
11.4253	0.0309234
11.4302	0.0307688
11.4646	0.0297342
11.4941	0.0289129
11.5285	0.0280262
11.558	0.0272933
11.5924	0.0265062
11.6218	0.0259089
11.6562	0.0252369
11.6857	0.0246954
11.7201	0.0241055
11.7496	0.0236439
11.7791	0.0232199
11.8135	0.0227675
11.843	0.0224309
11.8774	0.0220369
11.9068	0.0217256
11.9412	0.0213763
11.9707	0.0211014
12.0051	0.0208322
12.0346	0.0206273
12.069	0.0204093
12.0985	0.0202464
12.1329	0.0200891
12.1624	0.0199831
12.1968	0.0198851
12.2262	0.0198204
12.2557	0.0198029
12.2901	0.0197967
12.3196	0.0198307
12.354	0.0198952
12.3835	0.0199708
12.4179	0.0201016
12.4474	0.0202135
12.4818	0.0203742
12.5112	0.0205136
12.5456	0.0206828
12.5751	0.0208409
12.6095	0.0210345
12.639	0.0211459
12.6734	0.0212442
12.7029	0.0213041
12.7373	0.0213358
12.7668	0.0213242
12.7963	0.0212857
12.8306	0.0211739
12.8601	0.0210364
12.8945	0.020809
12.924	0.0205803
12.9584	0.0202381
12.9879	0.019896
13.0174	0.0195389
13.0223	0.0194725
13.0518	0.0190502
13.0862	0.0185377
13.1157	0.0180702
13.1501	0.0174926
13.1795	0.0169541
13.1943	0.0166785
13.2139	0.0163162
13.2434	0.0157863
13.2778	0.0151498
13.3073	0.014606
13.3368	0.0140813
13.3515	0.0138294
13.3712	0.0134879
13.4007	0.0129925
13.4351	0.0124113
13.4645	0.011928
13.4989	0.0113549
13.5186	0.0110352
13.5284	0.0108808
13.5628	0.010351
13.5923	0.00991443
13.6267	0.00941477
13.6562	0.00900327
13.6906	0.00853761
13.7201	0.00816782
13.7545	0.00777092
13.7839	0.00744685
13.8183	0.00708547
13.8478	0.00679227
13.8773	0.00649965
13.9117	0.00619373
13.9412	0.0059479
13.9756	0.00568203
14.0051	0.00545521
14.0198	0.00535073
14.0395	0.00523075
14.0689	0.00503922
14.1033	0.00482209
14.1328	0.00465922
14.1672	0.00447416
14.1967	0.00431868
14.2311	0.00414843
14.2606	0.00402564
14.295	0.00389666
14.3245	0.00378941
14.3589	0.00367926
14.3883	0.00357676
14.4178	0.00348837
14.4522	0.00342363
14.4817	0.00337324
14.5161	0.00330111
14.5456	0.00323657
14.58	0.00318671
14.6095	0.00317163
14.6439	0.00313237
14.6734	0.00311201
14.7077	0.00308158
14.7372	0.00306578
14.7716	0.00303159
14.8011	0.00301686
14.8355	0.00301197
14.865	0.0029938
14.8945	0.0029834
14.9289	0.00298045
14.9584	0.00296655
14.9928	0.0029542
15.0222	0.0029507
15.0566	0.00295655
15.0861	0.00295705
15.1205	0.00295336
15.15	0.00294639
15.1844	0.00294469
15.2139	0.00293956
15.2483	0.00292654
15.2778	0.00288982
15.3122	0.00286976
15.3416	0.00282354
15.376	0.00278069
15.4055	0.00274306
15.435	0.00269502
15.4694	0.00262677
15.4989	0.00257989
15.5333	0.00251857
15.5628	0.00246815
15.5972	0.00241644
15.6266	0.00236939
15.661	0.00230124
15.6905	0.00221165
15.7249	0.00211776
15.7544	0.00204632
15.7888	0.00198231
15.8183	0.00188595
15.8527	0.00178125
15.8822	0.00170254
15.9166	0.00160438
15.946	0.00152906
15.9755	0.00145085
16.0099	0.00138384
16.0394	0.00131998
16.0738	0.00125073
16.1033	0.00121862
16.1377	0.00116619
16.1672	0.00112199
16.2016	0.00107079
16.231	0.00104135
16.2654	0.00099378
16.2949	0.000938845
16.3293	0.000900691
16.3588	0.000862415
16.3932	0.00082549
16.4227	0.000795631
16.4571	0.000770665
16.4866	0.000747264
16.5161	0.00072503
16.5505	0.000698423
16.5799	0.000671923
16.6143	0.000646419
16.6438	0.000614746
16.6782	0.000599217
16.7077	0.000586554
16.7421	0.000583549
16.7716	0.000569851
16.806	0.000562748
16.8355	0.000561824
16.8699	0.000556163
16.8993	0.000540556
16.9337	0.000528003
16.9632	0.000509925
16.9976	0.000496175
17.0271	0.000481793
17.0566	0.000475678
17.091	0.00048177
17.1205	0.000468402
17.1549	0.000461707
17.1843	0.000463088
17.2187	0.000438886
17.2482	0.00044562
17.2826	0.000424423
17.3121	0.000425653
17.3465	0.000425678
17.376	0.000414514
17.4104	0.000403781
17.4399	0.000449761
17.4743	0.000443241
17.5037	0.000428358
17.5332	0.000411108
17.5676	0.000413879
17.5971	0.000405647
17.6315	0.000387918
17.661	0.00037067
17.6954	0.000348935
17.7249	0.000341556
17.7593	0.000325015
17.7887	0.000324313
17.8231	0.00032206
17.8526	0.000313071
17.887	0.000305083
17.9165	0.000313852
17.9509	0.000299948
17.9804	0.00030331
18.0148	0.000301522
18.0443	0.000302949
18.0737	0.000314614
18.1081	0.000321304
18.1376	0.000333586
18.172	0.000320244
18.2015	0.000307541
18.2359	0.000308932
18.2654	0.000329793
18.2998	0.000341372
18.3293	0.00036772
18.3637	0.000392361
18.3932	0.000375393
18.4275	0.000351551
18.457	0.000328541
18.4914	0.000312463
18.5209	0.000294952
18.5553	0.000284853
18.5848	0.000275119
18.6143	0.000297468
18.6487	0.000291726
18.6782	0.000277616
18.7126	0.000272056
18.742	0.000260597
18.7764	0.000247165
18.8059	0.000248474
18.8403	0.000281506
18.8698	0.000281401
18.9042	0.000297648
18.9337	0.000300447
18.9681	0.00030409
18.9976	0.00033681
19.032	0.0003346
19.0614	0.000325217
19.0958	0.00032077
19.1253	0.000333464
19.1548	0.000310303
19.1892	0.000300439
19.2187	0.000297626
19.2531	0.000293831
19.2826	0.000301117
19.317	0.000299935
19.3464	0.000302183
19.3808	0.000320027
19.4103	0.000319097
19.4447	0.000287258
19.4742	0.00027222
19.5086	0.000268384
19.5381	0.000253199
19.5725	0.000265347
19.602	0.000273776
19.6364	0.000271938
19.6658	0.000259797
19.6953	0.000256126
19.7297	0.000252941
19.7592	0.000251762
19.7936	0.000253072
19.8231	0.000247777
19.8575	0.000241513
19.887	0.000243298
19.9214	0.000258943
19.9508	0.000286951
19.9852	0.00027578
20.0147	0.000276277
20.0491	0.000259275
20.0786	0.000251494
20.113	0.000240838
20.1425	0.000242192
20.172	0.000248724
20.2064	0.000232441
20.2359	0.0002281
20.2703	0.000250787
20.2997	0.000243751
20.3341	0.000252519
20.3636	0.00024287
20.398	0.000226935
20.4275	0.00022905
20.4619	0.000232593
20.4914	0.000230281
20.5258	0.000212886
20.5553	0.000211756
20.5897	0.000200985
20.6191	0.000190511
20.6535	0.000195203
20.683	0.000209564
20.7125	0.000203698
20.7469	0.000199651
20.7764	0.000198253
20.8108	0.000194676
20.8403	0.000190247
20.8747	0.000189478
20.9041	0.000180034
20.9385	0.000185266
20.968	0.000176971
21.0024	0.000175808
21.0319	0.000173838
21.0663	0.000164646
21.0958	0.000169912
21.1302	0.00019023
21.1597	0.000180995
21.1941	0.000170405
21.2235	0.000176899
21.253	0.000170573
21.2874	0.000182665
21.3169	0.000166218
21.3513	0.000187696
21.3808	0.000190455
21.4152	0.000210202
21.4447	0.000225903
21.4791	0.000212537
21.5085	0.000207905
21.5429	0.000181517
21.5724	0.0001713
21.6068	0.000177033
21.6363	0.000172571
21.6707	0.000170029
21.7002	0.000161207
21.7346	0.000156737
21.7641	0.000152485
21.7935	0.000163755
21.8279	0.000173474
21.8574	0.000178875
21.8918	0.000170704
21.9213	0.000175786
21.9557	0.000196886
21.9852	0.000205261
22.0196	0.000180494
22.0491	0.000179553
22.0835	0.000165656
22.113	0.000152765
22.1473	0.000175921
22.1768	0.000188405
22.2112	0.000174776
22.2407	0.000176556
22.2751	0.000179552
22.3046	0.000165301
22.3341	0.000156942
22.3685	0.000164707
22.398	0.000167806
22.4324	0.00016664
22.4618	0.000146516
22.4962	0.000155203
22.5257	0.000140407
22.5601	0.000136405
22.5896	0.000124728
22.624	0.000126999
22.6535	0.000129605
22.6879	0.000116981
22.7174	0.000128819
22.7518	0.000148243
22.7812	0.00013342
22.8107	0.000120526
22.8451	0.000124635
22.8746	0.000159904
22.909	0.000161088
22.9385	0.000171153
22.9729	0.000163977
23.0024	0.000165185
23.0368	0.000167978
23.0662	0.000178063
23.1006	0.000167786
23.1301	0.000170207
23.1645	0.000162543
23.194	0.000152376
23.2284	0.000145777
23.2579	0.000151936
23.2923	0.000144512
23.3218	0.000140062
23.3512	0.00014281
23.3856	0.000145017
23.4151	0.000135744
23.4495	0.000120083
23.479	0.000113322
23.5134	0.000105168
23.5429	0.000106232
23.5773	9.84613e-05
23.6068	9.25148e-05
23.6412	9.11621e-05
23.6706	9.3731e-05
23.705	9.4023e-05
23.7345	8.35499e-05
23.7689	8.33725e-05
23.7984	7.75079e-05
23.8328	7.66836e-05
23.8623	9.26242e-05
23.8918	8.49742e-05
23.9262	6.78477e-05
23.9557	7.23167e-05
23.9901	6.01018e-05
24.0195	9.14672e-05
24.0539	9.24894e-05
24.0834	8.7969e-05
24.1178	0.000107909
24.1473	0.000111329
24.1817	0.000119563
24.2112	0.000126261
24.2456	0.000120993
24.2751	0.000113417
24.3095	0.000125674
24.3389	0.000114004
24.3733	0.000149587
24.4028	0.000132244
24.4323	0.000114747
24.4667	0.000108447
24.4962	0.000119324
24.5306	0.000119595
24.5601	0.000113005
24.5945	9.34471e-05
24.6239	8.74874e-05
24.6583	8.76303e-05
24.6878	0.000111196
24.7222	0.000103854
24.7517	9.50179e-05
24.7861	8.19129e-05
24.8156	7.82917e-05
24.85	7.57312e-05
24.8795	6.74535e-05
24.9139	0.000105854
24.9433	0.000110645
24.9728	0.000137742
25.0072	0.000120897
25.0367	0.000104133
25.0711	0.000125272
25.1006	0.000133683
25.135	0.000119067
25.1645	0.000110041
25.1989	9.31133e-05
25.2283	9.02978e-05
25.2627	8.75921e-05
25.2922	7.85583e-05
25.3266	8.07905e-05
25.3561	0.000101032
25.3905	0.000116236
25.42	9.70921e-05
25.4495	0.000109088
25.4839	9.92503e-05
25.5133	0.000107618
25.5477	0.000107743
25.5772	0.000107135
25.6116	0.000158269
25.6411	0.000136242
25.6755	0.000104379
25.705	0.000103578
25.7394	0.00011228
25.7689	0.000102735
25.8033	0.000102732
25.8328	9.00582e-05
25.8671	9.74797e-05
25.8966	0.000100041
25.931	9.78206e-05
25.9605	7.937e-05
25.99	5.83522e-05
26.0244	4.82704e-05
26.0539	4.17135e-05
26.0883	2.32552e-05
26.1178	2.54736e-05
26.1522	6.03303e-05
26.1816	5.58502e-05
26.216	5.32575e-05
26.2455	4.73771e-05
26.2799	3.53161e-05
26.3094	2.401e-05
26.3438	2.27836e-05
26.3733	3.57567e-05
26.4077	3.28041e-05
26.4372	4.60964e-05
26.4716	4.17878e-05
26.501	2.72189e-05
26.5305	1.42205e-05
26.5649	5.5142e-07
26.5944	-6.95154e-06
26.6288	3.60083e-05
26.6583	2.76854e-05
26.6927	1.20765e-05
26.7222	8.50265e-06
26.7566	2.75779e-05
26.786	2.15589e-05
26.8204	1.52927e-05
26.8499	1.5493e-05
26.8843	2.19129e-05
26.9138	1.76721e-05
26.9482	1.84204e-05
26.9777	7.67874e-06
27.0121	1.92714e-05
27.0416	2.80808e-05
27.071	1.53775e-05
27.1054	2.23629e-05
27.1349	1.61123e-05
27.1693	1.15419e-05
27.1988	7.34685e-06
27.2332	1.37735e-05
27.2627	-9.64207e-08
27.2971	-9.90963e-06
27.3266	-1.36839e-05
27.361	1.91101e-06
27.3904	9.70235e-06
27.4248	2.2172e-05
27.4543	2.20782e-05
27.4887	1.3327e-05
27.5182	8.76803e-06
27.5526	3.56968e-05
27.5821	3.15848e-05
27.6116	2.05469e-05
27.646	2.44217e-05
27.6755	3.22975e-05
27.7099	3.11026e-05
27.7393	4.11406e-05
27.7737	2.87191e-05
27.8032	1.88435e-05
27.8376	8.29897e-06
27.8671	1.42896e-05
27.9015	1.08107e-05
27.931	9.26545e-06
27.9654	5.23075e-06
27.9949	2.51725e-05
28.0293	2.25469e-05
28.0587	4.93537e-05
28.0882	6.7996e-05
28.1226	5.07666e-05
28.1521	5.55397e-05
28.1865	5.19286e-05
28.216	4.22264e-05
28.2504	2.57659e-05
28.2799	1.0403e-05
28.3143	2.84713e-05
28.3437	2.88728e-05
28.3781	4.1534e-05
28.4076	4.09343e-05
28.442	2.19879e-05
28.4715	1.57289e-05
28.5059	3.72961e-06
28.5354	-7.43753e-07
28.5698	-1.71232e-05
28.5993	-1.37513e-05
28.6287	-2.63256e-05
28.6631	-3.02351e-05
28.6926	-2.60844e-05
28.727	-7.64544e-06
28.7565	-1.1437e-05
28.7909	-1.19587e-05
28.8204	-1.81526e-05
28.8548	-2.85979e-05
28.8843	-1.51003e-05
28.9187	-1.33335e-05
28.9481	-2.20253e-05
28.9825	-2.21953e-05
29.012	-1.99175e-05
29.0464	-3.33061e-06
29.0759	-1.47833e-05
29.1103	-2.8142e-05
29.1398	-2.15471e-05
29.1693	-1.72444e-05
29.2037	-1.27834e-05
29.2332	-7.61179e-06
29.2675	-1.6561e-05
29.297	-1.32352e-05
29.3314	-6.18681e-06
29.3609	8.23589e-06
29.3953	1.62613e-05
29.4248	1.43766e-05
29.4592	1.24465e-05
29.4887	1.09953e-05
29.5231	9.51896e-06
-0.858544		-0.00284229
-0.837491		-0.00293866
-0.805912		-0.00301805
-0.774332		-0.00314375
-0.763806		-0.00317762
-0.742753		-0.00328736
-0.711174		-0.00335394
-0.679595		-0.00342432
-0.648016		-0.00340771
-0.616436		-0.00346217
-0.584857		-0.00358936
-0.553278		-0.00363262
-0.521699		-0.00363567
-0.49012		-0.00360783
-0.45854		-0.00361854
-0.426961		-0.00378054
-0.395382		-0.00389468
-0.363803		-0.00393205
-0.332224		-0.0039443
-0.300644		-0.00399604
-0.269065		-0.00391806
-0.237486		-0.00385665
-0.205907		-0.00385785
-0.174328		-0.00388507
-0.142748		-0.00387067
-0.111169		-0.00395238
-0.07959		-0.00399431
-0.0427476		-0.00398181
-0.0111684		-0.00391582
0.0204108		-0.00377997
0.05199		-0.00373649
0.0835692		-0.00364653
0.115148		-0.00353549
0.146728		-0.00336931
0.178307		-0.00325281
0.209886		-0.00325397
0.241465		-0.00318065
0.251992		-0.00316278
0.273044		-0.00308603
0.304624		-0.003006
0.336203		-0.00286617
0.367782		-0.00275767
0.399361		-0.00258251
0.43094		-0.00242869
0.46252		-0.00230224
0.494099		-0.00218809
0.525678		-0.00211852
0.557257		-0.0019878
0.588836		-0.00188248
0.620416		-0.00176974
0.651995		-0.00169532
0.683574		-0.00156236
0.720416		-0.00128231
0.751996		-0.0011185
0.783575		-0.000992085
0.815154		-0.000913507
0.846733		-0.000832358
0.878313		-0.000722695
0.909892		-0.000589631
0.941471		-0.000456314
0.97305		-0.000355924
1.00463		-0.000363735
1.02042		-0.000313714
1.03621		-0.000311891
1.05726		-0.000322698
1.06252		-0.00031326
1.06779		-0.000293554
1.09937		-0.000139177
1.13095		1.67382e-05
1.16253		5.22861e-05
1.1941		7.27358e-05
1.22568		7.50531e-06
1.25726		-1.14707e-05
1.28884		1.37889e-05
1.32042		1.41839e-05
1.352		7.34439e-05
1.38358		4.72085e-05
1.41516		5.79042e-05
1.44674		0.000100443
1.47832		-3.93489e-05
1.51516		-0.000148084
1.54674		-0.000208827
1.57832		-0.000287796
1.6099		-0.000314146
1.62042		-0.000350843
1.64148		-0.000461352
1.67306		-0.000529753
1.70463		-0.000611127
1.73621		-0.00068316
1.76779		-0.000750763
1.79937		-0.000866625
1.83095		-0.000996172
1.86253		-0.00110083
1.89411		-0.0011929
1.92569		-0.00130774
1.95727		-0.0014542
1.98885		-0.0015373
2.02043		-0.00160664
2.05201		-0.0017287
2.08359		-0.00174767
2.11516		-0.00178269
2.14674		-0.00184274
2.17832		-0.00199781
2.2099		-0.00216563
2.24148		-0.00223464
2.27306		-0.00223947
2.3099		-0.00237282
2.34148		-0.00253544
2.37306		-0.00259848
2.40464		-0.00259299
2.43622		-0.00264504
2.4678		-0.00268291
2.49938		-0.00280224
2.53096		-0.00301462
2.56254		-0.00304473
2.59412		-0.00302634
2.6257		-0.00296627
2.65727		-0.00286576
2.68885		-0.00283176
2.72043		-0.00279885
2.75201		-0.00287077
2.78359		-0.00284449
2.81517		-0.00284368
2.84675		-0.00296856
2.87833		-0.0029561
2.90991		-0.00293587
2.94149		-0.00297356
2.97307		-0.00300921
3.00465		-0.00303454
3.03622		-0.00298355
3.0678		-0.00299334
3.10465		-0.00291221
3.13623		-0.00274671
3.1678		-0.00272636
3.19938		-0.00277404
3.23096		-0.00282939
3.26254		-0.00291227
3.29412		-0.00294427
3.3257		-0.0028976
3.35728		-0.00278579
3.38886		-0.00268015
3.42044		-0.00259465
3.45202		-0.00254605
3.4836		-0.00254509
3.51518		-0.00242599
3.54676		-0.00236397
3.57833		-0.00241005
3.60991		-0.00255273
3.64149		-0.00263656
3.67307		-0.00251345
3.70465		-0.00235803
3.73623		-0.00226116
3.76781		-0.0021976
3.79939		-0.0022892
3.83097		-0.0023661
3.86781		-0.00258378
3.89939		-0.00275925
3.93097		-0.00275824
3.96255		-0.00269464
3.99413		-0.00250153
4.02571		-0.0023736
4.05729		-0.00239007
4.08886		-0.00236857
4.12044		-0.00234551
4.15202		-0.00230351
4.1836		-0.00238658
4.21518		-0.00244719
4.24676		-0.00237759
4.27834		-0.00234436
4.30992		-0.00226465
4.3415		-0.00230518
4.37308		-0.00229214
4.40466		-0.00228081
4.43624		-0.00232367
4.46782		-0.00227832
4.49939		-0.00226089
4.53097		-0.00223386
4.56255		-0.0022864
4.59413		-0.00236947
4.62571		-0.00242005
4.66255		-0.00243738
4.69413		-0.00243703
4.72571		-0.00240645
4.75729		-0.00237647
4.78887		-0.00237347
4.82045		-0.00234156
4.85203		-0.00222972
4.88361		-0.00215113
4.91519		-0.00225855
4.94677		-0.00233372
4.97835		-0.0023799
5.00992		-0.00243992
5.0415		-0.00242957
5.07308		-0.00242438
5.10466		-0.00234763
5.13624		-0.00221849
5.16782		-0.00217862
5.1994		-0.0022222
5.23098		-0.00232973
5.26256		-0.00228173
5.29414		-0.00213781
5.32572		-0.00210595
5.3573		-0.0020344
5.38888		-0.00201574
5.42045		-0.00201502
5.4573		-0.00200912
5.48888		-0.00201267
5.52046		-0.00192871
5.55203		-0.0019542
5.58361		-0.00207647
5.61519		-0.00216474
5.64677		-0.00224614
5.67835		-0.0021862
5.70993		-0.00212813
5.74151		-0.00205559
5.77309		-0.00202035
5.80467		-0.00205261
5.83625		-0.00203806
5.86783		-0.00207645
5.89941		-0.00206311
5.93099		-0.0020097
5.96256		-0.00199368
5.99414		-0.00195402
6.02572		-0.00197025
6.0573		-0.00199091
6.08888		-0.00192195
6.12046		-0.00190625
6.15204		-0.00183313
6.18362		-0.00183101
6.22046		-0.00186852
6.25204		-0.0018876
6.28362		-0.00200321
6.3152		-0.00207056
6.34678		-0.00213585
6.37836		-0.00220667
6.40994		-0.00213745
6.44152		-0.00213297
6.47309		-0.00200914
6.50467		-0.00200768
6.53625		-0.00203775
6.56783		-0.00199976
6.59941		-0.00195782
6.63099		-0.00189345
6.66257		-0.00187714
6.69415		-0.00188812
6.72573		-0.00190449
6.75731		-0.00194874
6.78889		-0.0019145
6.82047		-0.001863
6.85205		-0.00188244
6.88362		-0.00190213
6.9152		-0.00193329
6.94678		-0.00181255
6.97836		-0.00172782
7.0152		-0.00165077
7.04678		-0.00153958
7.07836		-0.00137015
7.10994		-0.00111168
7.14152		-0.000775972
7.1731		-0.00038455
7.17836		-0.000306357
7.20468		0.000156314
7.23626		0.000727141
7.26784		0.00145778
7.29942		0.00242957
7.30468		0.00262417
7.331		0.00362557
7.36258		0.00500652
7.3731		0.00554516
7.39415		0.00658809
7.42573		0.00813346
7.431		0.00838623
7.45731		0.00975072
7.48363		0.0111907
7.48889		0.0114841
7.52047		0.0133728
7.531		0.0139994
7.55205		0.0152597
7.57837		0.0168654
7.58363		0.0171642
7.61521		0.0190522
7.62574		0.0197386
7.64679		0.0210237
7.6731		0.0227472
7.67837		0.0231047
7.70995		0.0252323
7.71521		0.0256351
7.74153		0.0275201
7.75205		0.0282288
7.77311		0.0297232
7.79416		0.0312637
7.80995		0.0323828
7.831		0.0339587
7.84153		0.034752
7.86784		0.0367366
7.87311		0.0371489
7.90469		0.0395775
7.93626		0.0420613
7.94153		0.0425006
7.96784		0.0446292
7.97837		0.0455495
7.99942		0.0474442
8.00995		0.0483724
8.031		0.050249
8.04153		0.0512118
8.06258		0.0531217
8.07311		0.0540596
8.09416		0.0560015
8.10469		0.0569393
8.12574		0.0587262
8.13627		0.0596336
8.15732		0.0615248
8.16785		0.062454
8.1889		0.064385
8.19942		0.0653792
8.22048		0.0673915
8.231		0.0684211
8.25206		0.070687
8.25732		0.0712932
8.27837		0.0737035
8.28364		0.0743066
8.30469		0.0770017
8.31521		0.078484
8.32574		0.0800248
8.34153		0.0824343
8.34679		0.0833174
8.35732		0.0851978
8.37311		0.0883168
8.37837		0.0894419
8.3889		0.0918289
8.39943		0.0945308
8.40995		0.0976224
8.41522		0.0993024
8.42574		0.102905
8.43627		0.106805
8.44153		0.10886
8.44679		0.111029
8.45732		0.115801
8.46258		0.118419
8.46785		0.12118
8.47311		0.124042
8.47837		0.127045
8.48364		0.13022
8.4889		0.133535
8.49416		0.136977
8.49943		0.140571
8.50469		0.144409
8.50995		0.148494
8.51522		0.152803
8.52048		0.157282
8.52574		0.161864
8.53101		0.166597
8.53627		0.171528
8.54153		0.176627
8.5468		0.181961
8.55206		0.187437
8.55732		0.192932
8.56259		0.198776
8.56785		0.20515
8.57311		0.212057
8.57837		0.21909
8.58364		0.226062
8.5889		0.23324
8.59416		0.240584
8.59943		0.248144
8.60469		0.256025
8.60995		0.264211
8.61522		0.272739
8.62048		0.281565
8.62574		0.290603
8.63101		0.299784
8.63627		0.309095
8.64153		0.318576
8.6468		0.32815
8.65206		0.337835
8.65732		0.347741
8.66259		0.357949
8.66785		0.368462
8.67311		0.379232
8.67838		0.39013
8.68364		0.401051
8.6889		0.412119
8.69417		0.423271
8.69943		0.434472
8.70469		0.44572
8.70995		0.457115
8.71522		0.468813
8.72048		0.480728
8.72574		0.492835
8.73101		0.505049
8.73627		0.517187
8.74153		0.529201
8.7468		0.541231
8.75206		0.553252
8.75732		0.565261
8.76259		0.577368
8.76785		0.58957
8.77311		0.601612
8.77838		0.61381
8.78364		0.626324
8.7889		0.638532
8.79417		0.65035
8.79943		0.662086
8.80469		0.673721
8.80996		0.685183
8.81522		0.696709
8.82048		0.708209
8.82575		0.719481
8.83101		0.730669
8.83627		0.741719
8.84153		0.752477
8.8468		0.762995
8.85206		0.773361
8.85732		0.783521
8.86259		0.793435
8.86785		0.803211
8.87311		0.812912
8.87838		0.822604
8.88364		0.832212
8.8889		0.841551
8.89417		0.850493
8.89943		0.859085
8.90469		0.867498
8.90996		0.87566
8.91522		0.883466
8.92048		0.891053
8.92575		0.898509
8.93101		0.905727
8.93627		0.912672
8.94154		0.919314
8.9468		0.925628
8.95206		0.931675
8.95733		0.937472
8.96259		0.943013
8.96785		0.948204
8.97311		0.953152
8.97838		0.957975
8.98364		0.962585
8.9889		0.966933
8.99417		0.971013
8.99943		0.974794
9.00469		0.978216
9.00996		0.9814
9.01522		0.98437
9.02575		0.989403
9.03101		0.991611
9.03627		0.993522
9.0468		0.996729
9.05733		0.998917
9.07838		0.999873
9.09417		0.99834
9.10996		0.995148
9.12048		0.992076
9.13101		0.988017
9.13627		0.985727
9.14154		0.983242
9.1468		0.980598
9.15206		0.977848
9.15733		0.975032
9.16259		0.972131
9.16785		0.969103
9.17312		0.965877
9.17838		0.962378
9.18364		0.95866
9.18891		0.954794
9.19417		0.950761
9.19943		0.94663
9.2047		0.94247
9.20996		0.938223
9.21522		0.933893
9.22049		0.929524
9.22575		0.925063
9.23101		0.920441
9.23627		0.915657
9.24154		0.910734
9.2468		0.905703
9.25206		0.900608
9.25733		0.895471
9.26259		0.890305
9.26785		0.885091
9.27312		0.879814
9.27838		0.874457
9.28364		0.868988
9.28891		0.863427
9.29417		0.85777
9.29943		0.852043
9.3047		0.846314
9.30996		0.840636
9.31522		0.835012
9.32049		0.829388
9.32575		0.823717
9.33101		0.818058
9.33628		0.812415
9.34154		0.806653
9.3468		0.800778
9.35207		0.79488
9.35733		0.788966
9.36259		0.783001
9.36786		0.777076
9.37312		0.771263
9.37838		0.765495
9.38364		0.759721
9.38891		0.753907
9.39417		0.747982
9.39943		0.741913
9.4047		0.735765
9.40996		0.729607
9.41522		0.723503
9.42049		0.717518
9.42575		0.711669
9.43101		0.705905
9.43628		0.700178
9.44154		0.694418
9.4468		0.688583
9.45207		0.682712
9.45733		0.676759
9.46259		0.670778
9.46786		0.664852
9.47312		0.658999
9.47838		0.653247
9.48365		0.647555
9.48891		0.641877
9.49417		0.636236
9.49944		0.630616
9.5047		0.62493
9.50996		0.619068
9.51522		0.613242
9.52049		0.607615
9.52575		0.602099
9.53101		0.596685
9.53628		0.591462
9.54154		0.586419
9.5468		0.581323
9.55207		0.576142
9.55733		0.570919
9.56259		0.565702
9.56786		0.560486
9.57312		0.555248
9.57838		0.550047
9.58365		0.544925
9.58891		0.539844
9.59417		0.534865
9.59944		0.530031
9.6047		0.525221
9.60996		0.520406
9.61523		0.515624
9.62049		0.510871
9.62575		0.506164
9.63102		0.501558
9.63628		0.497064
9.64154		0.492618
9.6468		0.488196
9.65207		0.483844
9.65733		0.47953
9.66259		0.47518
9.66786		0.470807
9.67312		0.466447
9.67838		0.462111
9.68365		0.457845
9.68891		0.453667
9.69417		0.449549
9.69944		0.445482
9.7047		0.441497
9.70996		0.437584
9.71523		0.433701
9.72049		0.429824
9.72575		0.425978
9.73102		0.422178
9.73628		0.418433
9.74154		0.414697
9.74681		0.410986
9.75207		0.407365
9.75733		0.403878
9.7626		0.400469
9.76786		0.39701
9.77312		0.393557
9.77838		0.390154
9.78365		0.386744
9.78891		0.383395
9.79417		0.380133
9.79944		0.376895
9.8047		0.373712
9.80996		0.370506
9.81523		0.367341
9.82049		0.364243
9.82575		0.361142
9.83102		0.358049
9.83628		0.354936
9.84154		0.351844
9.84681		0.348811
9.85207		0.345824
9.85733		0.342907
9.8626		0.340087
9.86786		0.337347
9.87312		0.334614
9.87839		0.331899
9.88365		0.329182
9.88891		0.326432
9.89418		0.323687
9.89944		0.320979
9.9047		0.318319
9.91523		0.313179
9.92049		0.310752
9.92575		0.30836
9.93102		0.305993
9.93628		0.303628
9.94154		0.301235
9.95207		0.296542
9.95733		0.294224
9.9626		0.291924
9.96786		0.289713
9.97839		0.285425
9.98365		0.283287
9.98891		0.281147
9.99944		0.276772
10.0047		0.274613
10.01		0.272518
10.0205		0.268451
10.0258		0.266536
10.031		0.264616
10.0363		0.26271
10.0415		0.260789
10.0521		0.256861
10.0573		0.254958
10.0626		0.253062
10.0679		0.251187
10.0731		0.249387
10.0837		0.245917
10.0889		0.244195
10.0942		0.242474
10.0994		0.24071
10.11		0.237214
10.1152		0.235498
10.1258		0.232178
10.1363		0.229089
10.1468		0.225981
10.1521		0.224351
10.1626		0.221136
10.1731		0.217981
10.1837		0.215054
10.1942		0.212083
10.2047		0.208936
10.21		0.207311
10.2205		0.20437
10.2258		0.202924
10.231		0.20155
10.2468		0.197559
10.2573		0.194831
10.2679		0.192028
10.2784		0.189335
10.2889		0.187279
10.3047		0.183664
10.3152		0.181091
10.3205		0.17984
10.3258		0.178591
10.3415		0.175069
10.3521		0.17289
10.3679		0.169482
10.3784		0.167212
10.3837		0.166067
10.3942		0.163956
10.41		0.160942
10.4152		0.159886
10.4205		0.158797
10.4363		0.155567
10.4468		0.153613
10.4521		0.152712
10.4679		0.149981
10.4784		0.148076
10.4837		0.14712
10.4994		0.144403
10.51		0.142645
10.5152		0.141784
10.531		0.139103
10.5415		0.137353
10.5521		0.135726
10.5679		0.133363
10.5731		0.132539
10.5889		0.130106
10.6047		0.127848
10.61		0.127153
10.631		0.124275
10.6363		0.123536
10.6468		0.122035
10.6679		0.11937
10.6731		0.118705
10.6942		0.116036
10.6994		0.115368
10.7205		0.11294
10.731		0.111761
10.7416		0.110537
10.7626		0.108228
[truncated: 885 more rows]

## Sheet: Fig. 4C
CheR ITC run
	Models
	Model	Variable	Value	Confidence Interval (±)
	Independent	Kd (M)	2.003e-05	3.672e-06
		n	1	0
		ΔH (kJ/mol)	-33.2	1.561
		Ka (Mˉ¹)	49930
		-TΔS (kJ/mol)	6.383
		ΔG (kJ/mol)	-26.82
		ΔS (J/mol·K)	-21.41
	Blank (constant)	blank (µJ)	-2.86417	1.31972
			Confidence Level (%)	90
X: Injection	Y: Area Data (µJ)	Injection Volume (µL)	Moles (Syringe)	Moles (Cell)	Mole Ratio	Cell Volume (µL)	Independent Model	Blank (constant) Model	Model Sum	Residual
1	-140.016	5	5e-09	2.25e-08	0.222222	185	-138.106	-2.86417	-140.97	0.954393
2	-128.276	5	9.86486e-09	2.18919e-08	0.450617	185	-124.928	-2.86417	-127.792	-0.484196
3	-109.174	5	1.45982e-08	2.13002e-08	0.685357	185	-106.036	-2.86417	-108.9	-0.273045
4	-87.0682	5	1.92037e-08	2.07245e-08	0.926617	185	-82.5099	-2.86417	-85.3741	-1.69418
5	-60.8682	5	2.36847e-08	2.01644e-08	1.17458	185	-58.8928	-2.86417	-61.7569	0.888745
6	-39.4143	5	2.80446e-08	1.96194e-08	1.42943	185	-39.9041	-2.86417	-42.7682	3.35393
7	-30.8596	5	3.22866e-08	1.90892e-08	1.69136	185	-26.8169	-2.86417	-29.681	-1.17857
8	-21.4366	5	3.6414e-08	1.85733e-08	1.96056	185	-18.3865	-2.86417	-21.2507	-0.18588
9	-19.7517	5	4.04298e-08	1.80713e-08	2.23724	185	-12.9992	-2.86417	-15.8633	-3.88837
10	-14.5947	5	4.43371e-08	1.75829e-08	2.52161	185	-9.48522	-2.86417	-12.3494	-2.24532
11	-10.4385	5	4.81388e-08	1.71076e-08	2.81388	185	-7.12296	-2.86417	-9.98713	-0.451378
12	-8.94414	5	5.18378e-08	1.66453e-08	3.11426	185	-5.48429	-2.86417	-8.34846	-0.595681
13	-2.07534	5	5.54368e-08	1.61954e-08	3.42299	185	-4.31379	-2.86417	-7.17796	5.10262
14	-6.74914	5	5.89385e-08	1.57577e-08	3.7403	185	-3.45553	-2.86417	-6.3197	-0.429436
15	-5.64437	5	6.23455e-08	1.53318e-08	4.06642	185	-2.81155	-2.86417	-5.67572	0.0313513
16	-3.22778	5	6.56605e-08	1.49174e-08	4.4016	185	-2.3185	-2.86417	-5.18267	1.95489
17	-4.22767	5	6.88859e-08	1.45143e-08	4.74608	185	-1.93428	-2.86417	-4.79845	0.570781
18	-5.13207	5	7.20241e-08	1.4122e-08	5.10014	185	-1.63018	-2.86417	-4.49435	-0.637718
19	-4.54691	5	7.50775e-08	1.37403e-08	5.46403	185	-1.38619	-2.86417	-4.25036	-0.296551
20	-4.51847	5	7.80484e-08	1.33689e-08	5.83804	185	-1.18802	-2.86417	-4.05219	-0.466276
CheW-Rlike ITC run
	Models
	Model	Variable	Value	Confidence Interval (±)
	Independent	Kd (M)	8.886e-06	1.912e-06
		n	1	0
		ΔH (kJ/mol)	-43.34	1.251
		Ka (Mˉ¹)	112500
		-TΔS (kJ/mol)	14.5
		ΔG (kJ/mol)	-28.83
		ΔS (J/mol·K)	-48.64
	Blank (constant)	blank (µJ)	-6	0
			Confidence Level (%)	90
X: Injection	Y: Area Data (µJ)	Injection Volume (µL)	Moles (Syringe)	Moles (Cell)	Mole Ratio	Cell Volume (µL)	Independent Model	Blank (constant) Model	Model Sum	Residual
1	-219.695	5	5e-09	2.88e-08	0.173611	185	-202.85	-6	-208.85	-10.8454
2	-204.657	5	9.86486e-09	2.80216e-08	0.352045	185	-195.994	-6	-201.994	-2.66357
3	-191.774	5	1.45982e-08	2.72643e-08	0.535435	185	-184.175	-6	-190.175	-1.59853
4	-164.649	5	1.92037e-08	2.65274e-08	0.723919	185	-163.405	-6	-169.405	4.75525
5	-124.304	5	2.36847e-08	2.58105e-08	0.917639	185	-129.922	-6	-135.922	11.6178
6	-90.8256	5	2.80446e-08	2.51129e-08	1.11674	185	-88.5759	-6	-94.5759	3.75028
7	-58.7355	5	3.22866e-08	2.44341e-08	1.32137	185	-53.6972	-6	-59.6972	0.961712
8	-35.2581	5	3.6414e-08	2.37738e-08	1.53169	185	-31.882	-6	-37.882	2.62391
9	-23.1287	5	4.04298e-08	2.31312e-08	1.74785	185	-19.7411	-6	-25.7411	2.61238
10	-10.995	5	4.43371e-08	2.25061e-08	1.97001	185	-12.9408	-6	-18.9408	7.94584
11	-7.4036	5	4.81388e-08	2.18978e-08	2.19834	185	-8.93722	-6	-14.9372	7.53362
12	-10.3745	5	5.18378e-08	2.1306e-08	2.43302	185	-6.44466	-6	-12.4447	2.0702
13	-7.71101	5	5.54368e-08	2.07301e-08	2.67421	185	-4.81261	-6	-10.8126	3.1016
14	-9.17855	5	5.89385e-08	2.01698e-08	2.92211	185	-3.69719	-6	-9.69719	0.518632
15	-6.75532	5	6.23455e-08	1.96247e-08	3.17689	185	-2.90698	-6	-8.90698	2.15166
16	-6.99031	5	6.56605e-08	1.90943e-08	3.43875	185	-2.33006	-6	-8.33006	1.33975
17	-8.04362	5	6.88859e-08	1.85783e-08	3.70788	185	-1.89803	-6	-7.89803	-0.145596
18	-6.92918	5	7.20241e-08	1.80761e-08	3.98449	185	-1.56743	-6	-7.56743	0.638247
19	-6.88075	5	7.50775e-08	1.75876e-08	4.26878	185	-1.30972	-6	-7.30972	0.428968
20	-7.20907	5	7.80484e-08	1.71123e-08	4.56097	185	-1.10557	-6	-7.10557	-0.1035

## Sheet: Fig. S5A
SEC-MALS of CheA						SEC-MALS of CheW-Rlike
time (min)	Light Scattering	dRI	Molecular Weight			time (min)	Light Scattering	dRI	Molecular Weights (Da)
-0.467384	5.04599e-05					-0.78124	0.000448527
-0.457556	6.09106e-05					-0.76486	0.000468876
-0.428073	4.97034e-05					-0.707532	0.000508915
-0.393676	2.66886e-05					-0.658393	0.000510962
-0.364193	4.5324e-05					-0.609254	0.000480281
-0.329795	3.47901e-05					-0.551926	0.000480044
-0.300312	5.06694e-06					-0.502787	0.000498655
-0.265915	3.50545e-05					-0.445459	0.000606337
-0.236432	1.78466e-05					-0.39632	0.000671173
-0.202035	4.54349e-05					-0.338991	0.000630588
-0.172552	3.34356e-06					-0.289853	0.000594682
-0.138155	-7.69445e-07					-0.232524	0.000603106
-0.108671	1.11072e-05					-0.183386	0.000626746
-0.0742742	-8.23328e-06					-0.126057	0.000597674
-0.044791	-2.62456e-05					-0.0769183	0.000666709
-0.0103939	4.39863e-06					-0.0195898	0.000652065
0.0190893	-2.50915e-05					0.0295489	0.000603708
0.0534864	-6.40932e-05					0.0868774	0.000726703
0.0829696	-7.1679e-05					0.136016	0.000751824
0.117367	-3.65745e-05					0.185155	0.000756397
0.14685	-2.68935e-05					0.242483	0.000742995
0.181247	-2.68179e-05					0.291622	0.000701532
0.21073	-3.68755e-05					0.34895	0.000657807
0.245127	-6.28046e-05					0.398089	0.000608231
0.274611	-7.11952e-05					0.455418	0.000554094
0.309008	-1.98607e-05					0.504556	0.000534876
0.338491	-1.202e-05					0.561885	0.000613903
0.367974	-4.12923e-05					0.611024	0.00071089
0.402371	-4.23253e-05					0.668352	0.000657773
0.431854	-4.92937e-05					0.717491	0.000660998
0.466252	-4.44824e-05					0.774819	0.000618789
0.495735	-7.40235e-05					0.823958	0.000658779
0.530132	-6.79342e-05					0.881286	0.000673852
0.559615	-7.37102e-05					0.930425	0.000593707
0.594012	-0.000100199					0.987754	0.000738946
0.623495	-9.94197e-05					1.03689	0.000809407
0.657893	-0.000105113					1.08603	0.000784375
0.687376	-9.72604e-05					1.14336	0.000693358
0.721773	-7.65548e-05					1.1925	0.000663513
0.751256	-8.26149e-05					1.24983	0.000710776
0.785653	-5.87728e-05					1.29897	0.000719171
0.815136	-6.46822e-05					1.35629	0.00068113
0.849533	-2.99957e-05					1.40543	0.000634477
0.879017	-6.21196e-05					1.46276	0.000514665
0.913414	-9.02613e-05					1.5119	0.000497913
0.942897	-8.55026e-05					1.56923	0.000481362
0.977294	-4.47732e-05					1.61837	0.000475528
1.00678	-6.10413e-05					1.6757	0.000425075
1.04117	-5.92427e-05					1.72483	0.000468257
1.07066	-7.74353e-05					1.78216	0.000452992
1.10505	-6.22081e-05					1.8313	0.000422191
1.13454	-2.5777e-05					1.88863	0.000387945
1.16894	-2.57266e-05					1.93777	0.000479656
1.19842	-1.86397e-05					1.98691	0.000479547
1.23282	-3.43726e-05					2.04424	0.00048805
1.2623	-7.21857e-05					2.09337	0.00048411
1.29178	-7.50332e-05					2.1507	0.000413993
1.32618	-8.25421e-05					2.19984	0.0004504
1.35566	-7.1898e-05					2.25717	0.000391332
1.39006	-8.63914e-05					2.30631	0.000432837
1.41954	-0.000102692					2.36364	0.000508082
1.45394	-0.000147234					2.41278	0.000493715
1.48342	-0.000103812					2.4701	0.000524016
1.51782	-9.16611e-05					2.51924	0.00061512
1.5473	-0.000104972					2.57657	0.000561836
1.5817	-0.000114607					2.62571	0.000535383
1.61118	-9.84843e-05					2.68304	0.000491765
1.64558	-6.32256e-05					2.73218	0.000484594
1.67506	-6.48582e-05					2.78132	0.000460249
1.70946	-4.95448e-05					2.83864	0.000468689
1.73894	-3.38453e-05					2.88778	0.000423212
1.77334	-3.85933e-05					2.94511	0.000387362
1.80282	-5.76626e-05					2.99425	0.000425895
1.83722	-7.87915e-05					3.05158	0.000411754
1.8667	-5.97281e-05					3.10072	0.00042058
1.9011	-7.94645e-05					3.15805	0.00039606
1.93058	-2.2554e-05					3.20719	0.000364289
1.96498	-3.35457e-05					3.26451	0.000523713
1.99447	-3.03204e-05					3.31365	0.000556324
2.02886	-2.35359e-05					3.37098	0.000508701
2.05835	-4.41879e-05					3.42012	0.000452669
2.09274	-8.7021e-05					3.47745	0.000381914
2.12223	-9.95552e-05					3.52659	0.000432281
2.15662	-9.88511e-05					3.58392	0.000495708
2.18611	-0.000105241					3.63305	0.000455036
2.2205	-5.16899e-05					3.68219	0.000418018
2.24999	-7.31367e-05					3.73952	0.000379882
2.27947	-9.30723e-05					3.78866	0.000475735
2.31387	-0.000113938					3.84599	0.000431442
2.34335	-0.000113809					3.89513	0.000371366
2.37775	-9.15869e-05					3.95246	0.000366545
2.40723	-0.000101464					4.00159	0.000353988
2.44163	-7.96238e-05					4.05892	0.000320313
2.47111	-8.03403e-05					4.10806	0.000253406
2.50551	-7.29932e-05					4.16539	0.000344339
2.53499	-7.77272e-05					4.21453	0.000327247
2.56939	-0.000103471					4.27186	0.000297633
2.59887	-8.74959e-05					4.321	0.000448338
2.63327	-0.000107717					4.37832	0.000462802
2.66275	-9.93502e-05					4.42746	0.000409094
2.69715	-8.21054e-05					4.48479	0.000388997
2.72663	-0.000123579					4.53393	0.000331067
2.76103	-7.20703e-05					4.58307	0.000375226
2.79051	-9.80803e-05					4.6404	0.000393535
2.82491	-9.31031e-05					4.68954	0.000420475
2.85439	-6.60341e-05					4.74686	0.000350582
2.88879	-7.01262e-05					4.796	0.000316849
2.91827	-8.14988e-05					4.85333	0.000307779
2.95267	-8.00789e-05					4.90247	0.00032478
2.98215	-6.85341e-05					4.9598	0.000315797
3.01655	-9.76614e-05					5.00894	0.000360813
3.04603	-5.31287e-05					5.06627	0.000317444
3.08043	-2.84003e-05					5.1154	0.000285992
3.10991	-6.21302e-06					5.17273	0.000316689
3.14431	1.89351e-05					5.22187	0.000368208
3.17379	-2.84875e-05					5.2792	0.000360553
3.20328	-6.05048e-05					5.32834	0.000366907
3.23767	-5.77594e-05					5.37748	0.000317864
3.26716	-6.05622e-05					5.43481	0.000339243
3.30155	-7.64053e-05					5.48395	0.000279837
3.33104	-8.36558e-05					5.54127	0.000208817
3.36544	-7.2695e-05					5.59041	0.000236831
3.39492	-3.15116e-05					5.64774	0.000256234
3.42932	-5.94895e-05					5.69688	0.000200152
3.4588	-8.5551e-05					5.75421	0.00022377
3.4932	-0.000109991					5.80335	0.000220769
3.52268	-0.000120855					5.86068	0.000138515
3.55708	-0.000112132					5.90981	0.000175439
3.58656	-0.000112318					5.96714	0.000194588
3.62096	-8.9999e-05					6.01628	0.000275525
3.65044	-7.96543e-05					6.07361	0.000340387
3.68484	-0.000107318					6.12275	0.000378936
3.71432	-0.000113735					6.18008	0.000379961
3.74872	-0.000142691					6.22922	0.000371175
3.7782	-0.000141005					6.27835	0.000325201
3.8126	-0.000138352					6.33568	0.000242932
3.84208	-0.000156342					6.38482	0.000359272
3.87648	-0.000162171					6.44215	0.000326427
3.90596	-0.000196656					6.49129	0.000279842
3.94036	-0.000165698					6.54862	0.00038892
3.96984	-0.00017045					6.59776	0.000358205
4.00424	-0.000113378					6.65508	0.000298393
4.03372	-0.000108171					6.70422	0.000309109
4.06812	-0.000139667					6.76155	0.000206658
4.0976	-0.000173897					6.81069	0.000123631
4.12709	-0.000137909					6.86802	8.40025e-05
4.16148	-9.37429e-05					6.91716	0.000171098
4.19097	-0.000105018					6.97449	0.000206173
4.22536	-8.4023e-05					7.02362	0.000221309
4.25485	-2.27835e-05					7.08095	0.000204655
4.28924	-4.0308e-05					7.13009	0.000207509
4.31873	-6.49755e-05					7.17923	0.000243777
4.35312	-9.16423e-05					7.23656	0.000275246
4.38261	-3.98265e-05					7.2857	0.000398771
4.417	-4.10515e-05					7.34303	0.000402108
4.44649	-6.27606e-05					7.39216	0.000406908
4.48088	-0.000111025					7.44949	0.000369215
4.51037	-0.000131956					7.49863	0.000299222
4.54476	-6.23241e-05					7.55596	0.000298161
4.57425	-3.10144e-05					7.6051	0.000499416
4.60864	-3.72353e-05					7.66243	0.000422885
4.63813	-6.32692e-05					7.71157	0.000392302
4.67252	-0.000117019					7.7689	0.000438263
4.70201	-0.000116964					7.81803	0.000387298
4.73641	-9.54996e-05					7.87536	0.000398826
4.76589	-9.14352e-05					7.9245	0.000427833
4.80029	-0.000107185					7.97364	0.00031898
4.82977	-0.000116183					8.03097	0.000228519
4.86417	-6.93786e-05					8.08011	0.000147743
4.89365	-5.28242e-05					8.13744	8.51888e-05
4.92805	1.2039e-05					8.18657	9.27514e-05
4.95753	0.000124176					8.2439	0.000134705
4.99193	0.000114178					8.29304	0.000190031
5.02141	0.000104881					8.35037	0.000220712
5.05089	0.000104057					8.39951	0.000151777
5.08529	8.43395e-05					8.45684	0.000123943
5.11477	7.35964e-05					8.50598	0.000147333
5.14917	1.61929e-05					8.5633	0.000191981
5.17865	8.34474e-06					8.61244	0.00010984
5.21305	-2.99662e-06					8.66977	0.000123203
5.24253	2.50036e-05					8.71891	0.000199689
5.27693	-1.26593e-06					8.77624	0.000216725
5.30641	-3.85308e-05					8.82538	0.000195932
5.34081	-5.17389e-05					8.87452	0.000151048
5.37029	-7.33332e-05					8.93184	0.000161145
5.40469	-7.15443e-05					8.98098	0.000169145
5.43417	-8.86246e-05					9.03831	0.000145811
5.46857	-0.000112873					9.08745	0.000161022
5.49806	-0.000119163					9.14478	0.00021485
5.53245	-8.63081e-05					9.19392	0.000220233
5.56194	-8.24103e-05					9.25125	0.00019051
5.59633	-7.05012e-05					9.30038	0.000215858
5.62582	-4.09295e-05					9.35771	0.000173014
5.66021	-6.54825e-06					9.40685	0.000246953
5.6897	-1.89133e-05					9.46418	0.000208742
5.72409	-1.54967e-05					9.51332	0.000165404
5.75358	-9.34258e-06					9.57065	0.000161765
5.78797	6.79951e-06					9.61979	0.000213396
5.81746	-1.89081e-05					9.67711	0.000269606
5.85185	1.2276e-05					9.72625	0.000402354
5.88134	1.64996e-06					9.77539	0.00048584
5.91573	-4.55934e-06					9.83272	0.000502938
5.94522	3.58572e-05					9.88186	0.000713283
5.9747	0.000109638					9.93919	0.000966242
6.0091	0.000239076					9.98833	0.00117927
6.03858	0.000346668					10.0457	0.00173975
6.07298	0.000514372					10.0948	0.00214132
6.10246	0.000661208					10.1521	0.00284185
6.13686	0.000878166					10.2013	0.00367972
6.16634	0.00111511					10.2258	0.00418612
6.18108	0.00127927					10.2586	0.0049431
6.20074	0.00155225					10.3077	0.0064772
6.23022	0.00190016					10.3323	0.00738264
6.26462	0.00232709					10.3651	0.00871161
6.2941	0.00278763					10.3978	0.0102517
6.3285	0.00333526					10.4142	0.0110093
6.35798	0.00385686					10.4551	0.0130421
6.37764	0.00416631					10.4715	0.0139552
6.39238	0.00441487					10.5043	0.0159485
6.42186	0.00494955					10.5207	0.0168832
6.45626	0.00565435					10.5616	0.0193444
6.48574	0.00624731					10.5698	0.0199586
6.52014	0.00700875					10.6026	0.0224166
6.52505	0.00712811					10.6271	0.0242389
6.54962	0.00763372					10.6353	0.0248716
6.58402	0.00830985					10.6763	0.0280526
6.6135	0.00891059					10.7172	0.0313837
6.6479	0.00960024					10.7336	0.0328053
6.66756	0.00999975					10.75	0.0342646
6.67738	0.0101892					10.7827	0.0371783
6.71178	0.0109088					10.8155	0.0401515
6.74126	0.011516					10.8401	0.0422166
6.77566	0.0122687					10.8483	0.0429067
6.80023	0.0128424					10.881	0.0458407
6.80514	0.0129673					10.8892	0.0465737
6.83954	0.0138341					10.9138	0.0487822
6.86902	0.0145769					10.9465	0.0519098
6.90342	0.0154775					10.9793	0.0548169
6.91325	0.0157535					10.9957	0.0562493
6.93291	0.0164472					11.012	0.0576694
6.96239	0.0173784					11.0448	0.0606614
6.99679	0.0187498					11.053	0.0614267
7.02627	0.020102					11.0776	0.0636747
7.05084	0.0215013					11.1021	0.0658102
7.06067	0.0221498					11.1103	0.0664953
7.09015	0.0243738					11.1431	0.0693358
7.12455	0.0275591					11.1595	0.0706764
7.14912	0.030314					11.1758	0.0720049
7.15403	0.0308903					11.2086	0.0745918
7.17368	0.0333627					11.2168	0.0752127
7.18843	0.0353827					11.2577	0.078306
7.19334	0.0360995					11.2659	0.0789233
7.213	0.039114					11.2987	0.0812769
7.21791	0.0398917					11.3151	0.0824262
7.23265	0.0423649					11.3396	0.0841515
7.24739	0.0449085					11.3724	0.0862056
7.25231	0.0457813					11.3888	0.087236
7.26213	0.0475485					11.4215	0.0892784
7.27688	0.0502985					11.4297	0.0897513
7.28179	0.0512178					11.4707	0.0921979
7.29653	0.0540556					11.4871	0.0930879
7.31127	0.0569729					11.528	0.0952358
7.31619	0.0579518					11.5362	0.0956362
7.3211	0.0589243					11.5771	0.0974897
7.33584	0.0618666					11.6099	0.0988837
7.34567	0.0638249					11.6345	0.0999309
7.35058	0.0648156					11.6836	0.101786
7.36533	0.0677529					11.7409	0.103787
7.38007	0.0706592					11.7655	0.104599
7.39481	0.0735526					11.7901	0.105409
7.40955	0.0763608					11.8474	0.107413
7.42921	0.0799416					11.8965	0.109302
7.44395	0.082516					11.9211	0.110405
7.45869	0.0849969					11.9539	0.112179
7.47343	0.0873827					11.9784	0.113711
7.47834	0.0881535					12.003	0.115519
7.498	0.0910937					12.0194	0.1169
7.50783	0.0924917					12.044	0.119344
7.51766	0.0938485					12.0603	0.121167
7.53731	0.0964022					12.0767	0.123167
7.56188	0.0993297					12.0931	0.125314
7.57171	0.100412					12.1095	0.127699
7.59136	0.102479					12.1177	0.129032
7.60119	0.103467					12.1341	0.131721
7.62085	0.105317					12.1504	0.13467
7.63559	0.106605					12.1668	0.137808
7.65524	0.108225					12.1832	0.141101
7.66507	0.108988					12.1914	0.142845
7.69456	0.111128					12.2078	0.146519
7.69947	0.111464					12.2159	0.148474
7.72895	0.113322					12.2241	0.150515
7.73878	0.113889					12.2323	0.152583
7.76335	0.115239					12.2405	0.154761
7.79283	0.116778					12.2569	0.159298
7.82723	0.118458					12.2651	0.161755
7.8518	0.119603					12.2733	0.164234
7.85671	0.119814					12.2815	0.166729
7.8862	0.121074					12.2978	0.171863
7.92059	0.122457					12.306	0.17451
7.95008	0.123553					12.3142	0.177226
7.98447	0.12475					12.3224	0.180026
7.99922	0.125239					12.3306	0.182929
8.01396	0.125702					12.3388	0.185907
8.04835	0.12667					12.347	0.188895
8.07784	0.127342					12.3552	0.191942
8.11223	0.127944					12.3634	0.195037
8.12698	0.128134					12.3716	0.198242
8.14172	0.128279					12.3797	0.201536
8.17611	0.128389					12.3879	0.204872
8.2056	0.12829					12.3961	0.208255
8.23017	0.128069					12.4043	0.211743
8.23999	0.127952					12.4125	0.215205
8.26948	0.1276					12.4207	0.21876
8.30388	0.126932					12.4289	0.222376
8.33336	0.126245					12.4371	0.226032
8.36776	0.125325					12.4453	0.229764
8.37267	0.125199					12.4535	0.233545
8.39724	0.124516					12.4616	0.237328
8.43164	0.123649					12.4698	0.241164
8.46112	0.12301					12.478	0.245036
8.49552	0.1224					12.4862	0.248953
8.50534	0.12231					12.4944	0.252924
8.525	0.122143					12.5026	0.25701
8.5594	0.122198					12.5108	0.261117
8.57414	0.12236					12.519	0.265208
8.58888	0.12265					12.5272	0.269306
8.62328	0.123914					12.5353	0.273432
8.64785	0.1255					12.5435	0.277579
8.65276	0.125896					12.5517	0.281765
8.67733	0.128314					12.5599	0.286001
8.68716	0.129623					12.5681	0.290255
8.69698	0.131006					12.5763	0.294503
8.71664	0.134352					12.5845	0.298835
8.73138	0.137472					12.5927	0.30322
8.74121	0.139807					12.6009	0.307594
8.75104	0.142422					12.6091	0.31198
8.75595	0.143828					12.6172	0.31632
8.76578	0.1469					12.6254	0.320674
8.77069	0.14855					12.6336	0.325054
8.78052	0.152125					12.6418	0.329404
8.79035	0.156058					12.65	0.333793
8.79526	0.158171					12.6582	0.338294
8.80018	0.160424					12.6664	0.342792
8.80509	0.162729					12.6746	0.347206
8.81	0.165182					12.6828	0.351602
8.81492	0.167701					12.691	0.356024
8.81983	0.17034					12.6991	0.360429
8.82475	0.173163					12.7073	0.364829
8.82966	0.17611					12.7155	0.369162
8.83457	0.17909					12.7237	0.373496
8.83949	0.18218					12.7319	0.377913
8.8444	0.185406					12.7401	0.38231
8.84931	0.188754					12.7483	0.386619
8.85423	0.192263					12.7565	0.390951
8.85914	0.195916					12.7647	0.395257
8.86406	0.199748					12.7729	0.399513
8.86897	0.203643					12.781	0.403776
8.87388	0.207694					12.7892	0.408001
8.8788	0.211892					12.7974	0.412177
8.88371	0.216248					12.8056	0.416339
8.88863	0.22075					12.8138	0.420491
8.89354	0.225382					12.822	0.424649
8.89845	0.230171					12.8302	0.42877
8.90337	0.235131					12.8384	0.432866
8.90828	0.240218					12.8466	0.436917
8.9132	0.245459					12.8548	0.44093
8.91811	0.250867					12.8629	0.444956
8.92302	0.256463					12.8711	0.448955
8.92794	0.26229					12.8793	0.452885
8.93285	0.268213					12.8875	0.456786
8.93776	0.274253					12.8957	0.460636
8.94268	0.280449					12.9039	0.464486
8.94759	0.286824					12.9121	0.468341
8.95251	0.293364					12.9203	0.472141
8.95742	0.300067					12.9285	0.475894
8.96233	0.30692					12.9366	0.479596
8.96725	0.313933					12.9448	0.483272
8.97216	0.321066					12.953	0.486896
8.97708	0.32833					12.9612	0.490485
8.98199	0.335749					12.9694	0.494054
8.9869	0.343323					12.9776	0.497557
8.99182	0.351051					12.9858	0.501008
8.99673	0.358894					12.994	0.504426
9.00164	0.366884					13.0022	0.507798
9.00656	0.375068					13.0104	0.511125
9.01147	0.383319					13.0185	0.514412
9.01639	0.391663					13.0267	0.517645
9.0213	0.40016					13.0349	0.520826
9.02621	0.408824					13.0431	0.523958
9.03113	0.41762					13.0513	0.527059
9.03604	0.426421					13.0595	0.530107
9.04096	0.435364					13.0677	0.533111
9.04587	0.444375					13.0759	0.536101
9.05078	0.453452					13.0841	0.53903
9.0557	0.462605					13.0923	0.541897
9.06061	0.471898					13.1004	0.5447
9.06553	0.48126					13.1086	0.547459
9.07044	0.490688					13.1168	0.55017
9.07535	0.500183					13.1332	0.555426
9.08027	0.509798					13.1414	0.557963
9.08518	0.51957					13.1496	0.560456
9.09009	0.529266					13.1578	0.562902
9.09501	0.538928					13.166	0.565294
9.09992	0.548608					13.1823	0.569914
9.10484	0.558364					13.1905	0.572138
9.10975	0.568163					13.1987	0.574294
9.11466	0.577922					13.2151	0.578467
9.11958	0.587714					13.2233	0.580475
9.12449	0.597514					13.2397	0.584303
9.12941	0.607287					13.2479	0.58616
9.13432	0.617063					13.2642	0.589724
9.13923	0.626835					13.2724	0.591391
9.14415	0.636556					13.2888	0.594519
9.14906	0.646259					13.3052	0.597424
9.15397	0.655945					13.3298	0.601325
9.15889	0.665586					13.3461	0.603641
9.1638	0.675189					13.3707	0.606715
9.16872	0.684762					13.3789	0.607646
9.17363	0.69424					13.3953	0.609361
9.17854	0.703683					13.428	0.611989
9.18346	0.71302					13.4362	0.612564
9.18837	0.722277					13.4854	0.614772
9.19329	0.731462					13.4936	0.614979
9.1982	0.740606					13.5427	0.615058
9.20311	0.749667					13.5509	0.614878
9.20803	0.758641					13.5918	0.613362
9.21294	0.767537					13.6164	0.611873
9.21786	0.776273					13.6492	0.609489
9.22277	0.784865					13.6574	0.608746
9.22768	0.79333					13.6901	0.605358
9.2326	0.801662					13.6983	0.604406
9.23751	0.809867					13.7147	0.602464
9.24242	0.817922					13.7392	0.599371
9.24734	0.825842					13.7556	0.596988
9.25225	0.833622					13.7802	0.593289
9.25717	0.841258					13.7966	0.590575
9.26208	0.848741					13.8048	0.589213
9.26699	0.856072					13.813	0.587859
9.27191	0.863242					13.8293	0.584959
9.27682	0.870253					13.8457	0.581987
9.28174	0.877091					13.8621	0.578892
9.28665	0.88376					13.8785	0.575762
9.29156	0.890257					13.8949	0.572435
9.29648	0.896573					13.9112	0.569064
9.30139	0.902725					13.9194	0.567351
9.3063	0.90869					13.9358	0.563843
9.31122	0.91448					13.9522	0.560247
9.31613	0.920119					13.9604	0.558387
9.32105	0.925551					13.9686	0.556532
9.32596	0.930793					13.9768	0.55468
9.33087	0.935893					13.9849	0.55281
9.33579	0.940778					14.0013	0.548997
9.3407	0.945416					14.0095	0.547055
9.34562	0.94988					14.0177	0.545123
9.35053	0.954141					14.0259	0.543173
9.35544	0.958211					14.0423	0.539215
9.36036	0.962091					14.0505	0.537241
9.36527	0.96579					14.0586	0.535244
9.37019	0.969281					14.0668	0.533217
9.3751	0.972603					14.075	0.531172
9.38001	0.975718					14.0832	0.529109
9.38493	0.978621					14.0996	0.524977
9.38984	0.981336					14.1078	0.522908
9.39967	0.986217					14.1242	0.518763
9.40458	0.988364					14.1324	0.516655
9.4095	0.990324					14.1405	0.514542
9.41932	0.993726					14.1569	0.510322
9.42915	0.996382					14.1651	0.508228
9.44389	0.998971					14.1733	0.506092
9.44881	0.999486					14.1815	0.503946
9.4832	0.998339					14.1897	0.501815
9.49795	0.995551					14.1979	0.499681
9.51269	0.991298					14.2143	0.495396
9.5176	0.989598					14.2224	0.493235
9.52743	0.985829					14.2306	0.491069
9.53234	0.983858					14.2388	0.488906
9.54217	0.9793					14.247	0.486754
9.54708	0.976881					14.2552	0.484588
9.552	0.974359					14.2716	0.480249
9.55691	0.971672					14.2798	0.478116
9.56183	0.968862					14.288	0.476016
9.56674	0.965941					14.3043	0.471697
9.57165	0.962919					14.3125	0.469554
9.57657	0.959786					14.3207	0.46739
9.58148	0.956586					14.3371	0.463124
9.5864	0.953304					14.3453	0.460958
9.59131	0.9499					14.3617	0.45664
9.59622	0.946395					14.3699	0.454515
9.60114	0.94282					14.3781	0.452358
9.60605	0.939163					14.3862	0.450187
9.61096	0.935459					14.3944	0.448021
9.61588	0.931644					14.4026	0.445869
9.62079	0.927744					14.4108	0.443724
9.62571	0.923776					14.4272	0.439456
9.63062	0.919806					14.4354	0.437325
9.63553	0.915775					14.4436	0.435198
9.64045	0.911645					14.4518	0.43309
9.64536	0.907441					14.4599	0.430999
9.65028	0.903165					14.4681	0.428899
9.65519	0.898844					14.4845	0.424767
9.6601	0.894461					14.4927	0.422711
9.66502	0.890021					14.5091	0.418528
9.66993	0.88555					14.5173	0.416474
9.67485	0.88102					14.5337	0.412388
9.67976	0.876441					14.5418	0.410402
9.68467	0.871865					14.55	0.408373
9.68959	0.867256					14.5664	0.404234
9.6945	0.862595					14.5746	0.402159
9.69941	0.857886					14.591	0.398058
9.70433	0.853164					14.5992	0.396018
9.70924	0.848403					14.6156	0.39201
9.71416	0.843663					14.6237	0.390028
9.71907	0.838877					14.6401	0.386015
9.72398	0.834074					14.6483	0.384055
9.7289	0.829244					14.6565	0.382132
9.73381	0.824396					14.6647	0.380179
9.73873	0.819519					14.6729	0.378203
9.74364	0.814604					14.6893	0.374239
9.74855	0.809694					14.6975	0.372299
9.75347	0.804796					14.7056	0.370363
9.75838	0.799886					14.7138	0.368401
9.76329	0.79497					14.722	0.366457
9.76821	0.790108					14.7384	0.362637
9.77312	0.78517					14.7466	0.36074
9.77804	0.78021					14.763	0.356934
9.78295	0.775245					14.7712	0.355076
9.78786	0.77029					14.7875	0.351402
9.79278	0.765313					14.8039	0.347714
9.79769	0.760353					14.8121	0.345874
9.80261	0.755383					14.8285	0.342292
9.80752	0.750423					14.8449	0.338748
9.81243	0.745478					14.8531	0.336971
9.81735	0.740535					14.8694	0.333523
9.82226	0.735589					14.8858	0.32999
9.82718	0.730645					14.894	0.328232
9.83209	0.725716					14.9104	0.324776
9.837	0.720787					14.9186	0.32306
9.84192	0.715893					14.9268	0.321331
9.84683	0.710996					14.935	0.31961
9.85174	0.706109					14.9513	0.316215
9.85666	0.701228					14.9677	0.31285
9.86157	0.696373					14.9841	0.309543
9.86649	0.691518					14.9923	0.307931
9.8714	0.686675					15.0087	0.304745
9.87631	0.68185					15.025	0.301558
9.88123	0.677063					15.0414	0.298367
9.88614	0.672271					15.0578	0.295228
9.89106	0.667488					15.0742	0.292164
9.89597	0.662753					15.0906	0.289092
9.90088	0.658019					15.1069	0.286068
9.9058	0.653299					15.1233	0.283096
9.91071	0.648597					15.1315	0.281633
9.91562	0.64393					15.1397	0.280196
9.92054	0.639288					15.1561	0.277295
9.92545	0.63463					15.1725	0.274476
9.93037	0.63					15.1806	0.273106
9.93528	0.625376					15.1888	0.271696
9.94019	0.620777					15.2052	0.268888
9.94511	0.616185					15.2216	0.266119
9.95002	0.611619					15.238	0.263412
9.95494	0.607082					15.2544	0.260717
9.95985	0.602547					15.2789	0.256728
9.96476	0.598044					15.2871	0.255417
9.96968	0.593556					15.2953	0.254115
9.97459	0.589107					15.3117	0.25156
9.97951	0.58469					15.3281	0.249034
9.98442	0.580246					15.3444	0.246508
9.98933	0.575823					15.3526	0.245274
9.99425	0.571411					15.369	0.242815
9.99916	0.567053					15.3936	0.239257
10.0041	0.562749					15.41	0.236929
10.009	0.558434					15.4345	0.233417
10.0139	0.554097					15.4509	0.231091
10.0188	0.549787					15.4755	0.227699
10.0237	0.54548					15.5001	0.224361
10.0286	0.541199					15.5164	0.222159
10.0336	0.536941					15.541	0.218861
10.0385	0.532705					15.5574	0.216699
10.0434	0.528505					15.5656	0.215614
10.0483	0.524308					15.5819	0.21345
10.0532	0.520122					15.6065	0.210252
10.0581	0.515965					15.6311	0.207125
10.063	0.511807					15.6557	0.204083
10.068	0.507666					15.6638	0.203053
10.0729	0.503545					15.6802	0.201018
10.0778	0.499452					15.7048	0.198068
10.0827	0.495425					15.713	0.197087
10.0876	0.491401					15.7294	0.19514
10.0925	0.487391					15.7539	0.192211
10.0974	0.483388					15.7621	0.191234
10.1024	0.4794					15.7785	0.189324
10.1073	0.475437					15.8031	0.186496
10.1122	0.471496					15.8195	0.184619
10.1171	0.46759					15.8276	0.183674
10.122	0.463721					15.8522	0.180929
10.1269	0.459858					15.8686	0.179115
10.1318	0.455997					15.8768	0.178208
10.1367	0.45219					15.9095	0.174662
10.1417	0.448397					15.9259	0.172944
10.1466	0.444614					15.9341	0.1721
10.1515	0.440872					15.9669	0.168788
10.1564	0.437151					15.9751	0.167962
10.1613	0.433454					15.9914	0.16637
10.1662	0.429763					16.0242	0.163246
10.1711	0.426099					16.0324	0.162479
10.1761	0.422464					16.057	0.160202
10.181	0.418833					16.0815	0.15801
10.1859	0.415238					16.0897	0.157302
10.1908	0.411672					16.1225	0.154509
10.1957	0.408103					16.1389	0.153125
10.2006	0.404557					16.1634	0.151126
10.2055	0.401055					16.188	0.149219
10.2105	0.397594					16.1962	0.148576
10.2154	0.394134					16.2371	0.145472
10.2203	0.390691					16.2453	0.144879
10.2252	0.387304					16.2781	0.142527
10.2301	0.383926					16.2945	0.141379
10.235	0.380568					16.319	0.139787
10.2399	0.377225					16.3518	0.137619
10.2449	0.373891					16.3682	0.136558
10.2498	0.370577					16.4009	0.134426
10.2547	0.367312					16.4091	0.1339
10.2596	0.364066					16.4583	0.130851
10.2645	0.36083					16.5074	0.127917
10.2694	0.357644					16.5565	0.125095
10.2743	0.354485					16.5647	0.124623
10.2793	0.351335					16.6139	0.121827
10.2842	0.348219					16.663	0.118978
10.2891	0.345137					16.7121	0.116192
10.294	0.342066					16.7203	0.115723
10.2989	0.339015					16.7695	0.112974
10.3038	0.335989					16.8186	0.110253
10.3087	0.332991					16.8268	0.1098
10.3136	0.330003					16.8759	0.107156
10.3186	0.327038					16.9333	0.104087
10.3235	0.3241					16.9824	0.101464
10.3284	0.321183					17.0397	0.0985117
10.3333	0.318296					17.0889	0.09611
10.3382	0.315434					17.1052	0.0953298
10.3431	0.312618					17.1462	0.0934455
10.348	0.309831					17.1708	0.0923841
10.353	0.307071					17.1953	0.091398
10.3579	0.304313					17.2445	0.0895434
10.3628	0.301568					17.2527	0.089272
10.3677	0.298848					17.3018	0.0877272
10.3726	0.296159					17.3428	0.086702
10.3775	0.293495					17.3591	0.0863139
10.3824	0.290856					17.4083	0.0852821
10.3874	0.288238					17.4656	0.0845014
10.3923	0.285644					17.5147	0.084306
10.3972	0.283084					17.5639	0.0842275
10.4021	0.280551					17.6212	0.0845351
10.407	0.278046					17.6703	0.0851047
10.4119	0.275532					17.7277	0.0861046
10.4168	0.273043					17.7604	0.0867641
10.4218	0.270576					17.7768	0.0871474
10.4267	0.268127					17.8341	0.0886483
10.4316	0.265705					17.8751	0.0898334
10.4365	0.263326					17.8833	0.0900758
10.4463	0.258617					17.9406	0.0918297
10.4512	0.256293					17.9734	0.092834
10.4562	0.253997					17.9897	0.0933464
10.4611	0.25173					18.0471	0.0950534
10.4709	0.247247					18.0716	0.0957621
10.4758	0.245046					18.0962	0.0964746
10.4807	0.242887					18.1535	0.0981395
10.4905	0.238603					18.1781	0.0986656
10.4955	0.236481					18.2027	0.0992219
10.5004	0.234386					18.26	0.100232
10.5102	0.230287					18.3091	0.100788
10.5151	0.228224					18.3583	0.101123
10.5249	0.224171					18.4156	0.10114
10.5299	0.222179					18.4648	0.100915
10.5348	0.22022					18.5221	0.100345
10.5446	0.216358					18.5712	0.0996482
10.5495	0.21447					18.6285	0.0986004
10.5593	0.210685					18.6367	0.0984439
10.5643	0.208838					18.6777	0.0975791
10.5692	0.207017					18.735	0.0962768
10.5741	0.205204					18.7678	0.0955059
10.5839	0.201612					18.7842	0.0951064
10.5888	0.199831					18.8415	0.093638
10.5987	0.196353					18.8824	0.0926083
10.6085	0.192977					18.8906	0.0923939
10.6134	0.19131					18.948	0.0908889
10.6232	0.188016					18.9971	0.089742
10.6281	0.186411					19.0053	0.0895652
10.633	0.184829					19.0544	0.0887153
10.6429	0.181712					19.1036	0.0879142
10.6527	0.178632					19.1609	0.0872986
10.6576	0.177095					19.21	0.0869894
10.6674	0.17407					19.2592	0.0868241
10.6773	0.171094					19.3165	0.0870032
10.6871	0.168186					19.3656	0.0872341
10.692	0.166753					19.423	0.0880323
10.6969	0.165339					19.4721	0.0887008
10.7068	0.162556					19.5294	0.0896868
10.7215	0.158475					19.5376	0.0898482
10.7313	0.155829					19.5786	0.0906727
10.7412	0.153282					19.6359	0.0921952
10.751	0.15075					19.6523	0.0926783
10.7559	0.149488					19.685	0.0936104
10.7608	0.148238					19.7424	0.0953471
10.7756	0.144606					19.7505	0.0956449
10.7854	0.142236					19.7915	0.0971365
10.8001	0.138767					19.8324	0.0988829
10.8099	0.136525					19.8488	0.0996969
10.8198	0.134335					19.8898	0.101839
10.8247	0.133261					19.898	0.102312
10.8394	0.130051					19.9307	0.104608
10.8493	0.127965					19.9553	0.106668
10.864	0.124912					19.9635	0.107421
10.8787	0.121945					19.9962	0.11099
10.8837	0.120987					20.0044	0.11206
10.8935	0.119082					20.0208	0.114354
10.9082	0.116272					20.0372	0.116934
10.9131	0.115351					20.0536	0.119859
10.923	0.113556					20.07	0.123252
10.9426	0.110016					20.0781	0.125125
10.9475	0.109153					20.0945	0.129096
10.9574	0.107477					20.1027	0.131284
10.9721	0.104982					20.1109	0.133581
10.977	0.104158					20.1191	0.135947
10.9918	0.101777					20.1273	0.138427
11.0114	0.0987133					20.1355	0.141088
11.0311	0.0957529					20.1437	0.143933
11.0409	0.0942925					20.1518	0.146792
11.0507	0.0928678					20.16	0.149787
11.0704	0.0900689					20.1682	0.152932
11.0753	0.0893854					20.1764	0.15629
11.09	0.0873714					20.1846	0.159734
11.1048	0.0853989					20.1928	0.163303
11.1097	0.0847587					20.201	0.167025
11.1343	0.0816174					20.2092	0.170857
11.1392	0.080999					20.2174	0.17486
11.1588	0.0785748					20.2256	0.179032
11.1687	0.0773901					20.2337	0.183321
11.1834	0.0756564					20.2419	0.187918
11.2031	0.0734083					20.2501	0.192615
11.208	0.0728523					20.2583	0.197374
11.2325	0.0701314					20.2665	0.202303
11.2571	0.0675263					20.2747	0.207372
11.2669	0.0665066					20.2829	0.212601
11.2866	0.0645515					20.2911	0.217994
11.2964	0.0635938					20.2993	0.223524
11.3161	0.0617679					20.3075	0.229209
11.3308	0.0603638					20.3156	0.235031
11.3505	0.0585366					20.3238	0.241028
11.3603	0.057652					20.332	0.247236
11.38	0.0559705					20.3402	0.253629
11.3947	0.0547324					20.3484	0.260122
11.4144	0.0530974					20.3566	0.266818
11.4242	0.0522931					20.3648	0.273612
11.4537	0.0499916					20.373	0.28061
11.4586	0.0496176					20.3812	0.287784
11.4881	0.0474283					20.3894	0.295135
11.493	0.0470803					20.3975	0.302671
11.5225	0.0449837					20.4057	0.310268
11.5323	0.0442926					20.4139	0.318119
11.5519	0.0429544					20.4221	0.326017
11.5765	0.0413508					20.4303	0.334107
11.5863	0.0407201					20.4385	0.342268
11.6158	0.0388797					20.4467	0.350504
11.6207	0.0385858					20.4549	0.358911
11.6453	0.0371419					20.4631	0.367455
11.6699	0.0357158					20.4713	0.376077
11.6797	0.0351634					20.4794	0.384822
11.7092	0.0336183					20.4876	0.393773
11.7239	0.0328342					20.4958	0.402838
11.7436	0.0318107					20.504	0.411949
11.7731	0.0303567					20.5122	0.421198
11.7829	0.0298682					20.5204	0.430575
11.8075	0.0287031					20.5286	0.440026
11.8369	0.0273826					20.5368	0.449577
11.8419	0.0271735					20.545	0.45924
11.8713	0.0259406					20.5531	0.469014
11.9008	0.0248041					20.5613	0.478949
11.9156	0.0242502					20.5695	0.489063
11.9352	0.0235112					20.5777	0.499136
11.9647	0.0224686					20.5859	0.509224
11.9991	0.0213359					20.5941	0.519414
12.0286	0.0204045					20.6023	0.529638
12.063	0.0193751					20.6105	0.539896
12.0925	0.01864					20.6187	0.550277
12.0974	0.0185146					20.6269	0.56076
12.1269	0.0177626					20.635	0.571188
12.1563	0.0170565					20.6432	0.581635
12.1907	0.0162311					20.6514	0.592086
12.2153	0.0156734					20.6596	0.602533
12.2202	0.0155649					20.6678	0.612953
12.2546	0.0148468					20.676	0.623392
12.2841	0.0143652					20.6842	0.633785
12.3185	0.0136965					20.6924	0.644148
12.348	0.0131761					20.7006	0.654566
12.3726	0.012782					20.7088	0.664948
12.3824	0.0126181					20.7169	0.675178
12.4119	0.0121395					20.7251	0.685386
12.4463	0.011737					20.7333	0.695477
12.4758	0.0113158					20.7415	0.705506
12.5101	0.0108608					20.7497	0.71548
12.5396	0.0105278					20.7579	0.725385
12.5691	0.0102184					20.7661	0.73524
12.6035	0.0098795					20.7743	0.744909
12.633	0.00959572					20.7825	0.754499
12.6674	0.00931147					20.7907	0.763971
12.6969	0.00912327					20.7988	0.773289
12.7313	0.00892888					20.807	0.78243
12.7608	0.00877666					20.8152	0.791442
12.7952	0.00862265					20.8234	0.800311
12.8246	0.00855791					20.8316	0.809027
12.859	0.00846988					20.8398	0.817587
12.8885	0.00847295					20.848	0.825975
12.9229	0.00854046					20.8562	0.834196
12.9524	0.0086034					20.8644	0.842252
12.9868	0.00865748					20.8726	0.850145
13.0163	0.00870077					20.8807	0.857856
13.0507	0.00873613					20.8889	0.865389
13.0802	0.00880638					20.8971	0.87272
13.1146	0.00888896					20.9053	0.879895
13.144	0.0089302					20.9135	0.886918
13.1784	0.00899499					20.9217	0.893654
13.2079	0.00908515					20.9299	0.900175
13.2423	0.00912702					20.9381	0.906479
13.2718	0.00919008					20.9463	0.912603
13.3062	0.009183					20.9544	0.918518
13.3357	0.00909834					20.9626	0.924242
13.3701	0.0089721					20.9708	0.929836
13.3996	0.00887742					20.979	0.935134
13.434	0.00878081					20.9872	0.9402
13.4634	0.00857437					20.9954	0.945062
13.4929	0.00837504					21.0036	0.949746
13.5273	0.00807187					21.0118	0.954205
13.5568	0.00782556					21.02	0.958501
13.5912	0.00750667					21.0282	0.962536
13.6207	0.00720979					21.0363	0.966316
13.6403	0.00702582					21.0445	0.969917
13.6551	0.0069047					21.0527	0.973351
13.6846	0.00673709					21.0609	0.976535
13.719	0.00639387					21.0691	0.97954
13.7484	0.00611002					21.0773	0.982403
13.7828	0.00579995					21.0855	0.984957
13.8123	0.00558112					21.0937	0.987317
13.8467	0.00534174					21.1101	0.991389
13.8762	0.00512846					21.1182	0.993097
13.9106	0.00490149					21.1346	0.995955
13.9401	0.00470739					21.1592	0.998818
13.9745	0.00447546					21.1674	0.999438
14.004	0.00436328					21.2247	0.998324
14.0384	0.00417009					21.2493	0.995314
14.0433	0.00414288					21.2657	0.992488
14.0678	0.00403337					21.2738	0.990802
14.1022	0.00386503					21.282	0.988966
14.1317	0.00372135					21.2984	0.984951
14.1661	0.00362118					21.3066	0.982698
14.1956	0.00354427					21.3148	0.98029
14.23	0.00340266					21.323	0.977811
14.2595	0.00331578					21.3312	0.975164
14.2939	0.00325801					21.3394	0.972384
14.3234	0.0032182					21.3476	0.969549
14.3578	0.00324225					21.3557	0.966606
14.3872	0.00320926					21.3639	0.963435
14.4167	0.00318644					21.3721	0.960154
14.4511	0.00313039					21.3803	0.9568
14.4806	0.00316396					21.3885	0.953381
14.515	0.00318266					21.3967	0.949767
14.5445	0.00318973					21.4049	0.946032
14.5789	0.00316947					21.4131	0.942258
14.6084	0.00314663					21.4213	0.93839
14.6428	0.00318411					21.4295	0.934423
14.6723	0.00318891					21.4376	0.930331
14.7066	0.00329976					21.4458	0.92613
14.7361	0.00331455					21.454	0.921839
14.7705	0.00334474					21.4622	0.917506
14.8	0.00338938					21.4704	0.913102
14.8344	0.00347189					21.4786	0.908561
14.8639	0.00356678					21.4868	0.903974
14.8983	0.00359439					21.495	0.899316
14.9278	0.00365248					21.5032	0.89458
14.9622	0.00371198					21.5114	0.889864
14.9917	0.00382258					21.5195	0.885019
15.0261	0.00392926					21.5277	0.880051
15.0555	0.00397102					21.5359	0.875036
15.0899	0.00402906					21.5441	0.86994
15.1194	0.00408699					21.5523	0.864833
15.1538	0.00411988					21.5605	0.85969
15.1784	0.00415953					21.5687	0.854473
15.1833	0.00416804					21.5769	0.84916
15.2177	0.00419259					21.5851	0.843848
15.2472	0.00421263					21.5933	0.838463
15.2816	0.00422437					21.6014	0.833019
15.3111	0.0042329					21.6096	0.827559
15.3405	0.00422986					21.6178	0.82208
15.3749	0.00418876					21.626	0.816519
15.4044	0.00422886					21.6342	0.810977
15.4388	0.00423713					21.6424	0.805472
15.4683	0.00427512					21.6506	0.79999
15.5027	0.00420434					21.6588	0.794369
15.5273	0.0041547					21.667	0.788648
15.5322	0.00413714					21.6751	0.782913
15.5666	0.00405423					21.6833	0.777212
15.5961	0.0040179					21.6915	0.771506
15.6305	0.00391192					21.6997	0.765753
15.6599	0.00382147					21.7079	0.75997
15.6943	0.00368265					21.7161	0.754165
15.7238	0.00355969					21.7243	0.748358
15.7582	0.00340442					21.7325	0.742541
15.7877	0.00325871					21.7407	0.736722
15.8221	0.00307622					21.7489	0.730896
15.8516	0.00292592					21.757	0.725103
15.886	0.00279539					21.7652	0.719269
15.9155	0.0026839					21.7734	0.713427
15.9499	0.00253709					21.7816	0.707604
15.9793	0.00245807					21.7898	0.701814
16.0137	0.00231106					21.798	0.696055
16.0432	0.0022467					21.8062	0.690255
16.0776	0.00212501					21.8144	0.684428
16.1071	0.00203756					21.8226	0.678608
16.1415	0.00192661					21.8308	0.672813
16.171	0.00185591					21.8389	0.667046
16.2054	0.00180886					21.8471	0.661266
16.2349	0.00174313					21.8553	0.655516
16.2693	0.00166414					21.8635	0.649818
16.2987	0.00159855					21.8717	0.644115
16.3282	0.00153069					21.8799	0.638438
16.3626	0.00145886					21.8881	0.632744
16.3921	0.00138789					21.8963	0.627067
16.4265	0.0013395					21.9045	0.621449
16.456	0.00130376					21.9127	0.615815
16.4855	0.00127369					21.9208	0.61022
16.4904	0.00126633					21.929	0.60468
16.5199	0.00123721					21.9372	0.599159
16.5543	0.00116646					21.9454	0.593642
16.5837	0.00112366					21.9536	0.588111
16.6181	0.00107375					21.9618	0.582622
16.6476	0.0010425					21.97	0.577229
16.682	0.00100845					21.9782	0.571929
16.7115	0.000994605					21.9864	0.566562
16.7459	0.00101069					21.9946	0.561263
16.7754	0.000999472					22.0027	0.556029
16.8098	0.000949655					22.0109	0.550729
16.8393	0.000903057					22.0191	0.545491
16.8737	0.00095707					22.0273	0.540285
16.9031	0.000953202					22.0355	0.535071
16.9375	0.000903798					22.0437	0.529872
16.967	0.000866233					22.0519	0.524737
17.0014	0.000832092					22.0601	0.519629
17.0309	0.000814202					22.0683	0.514547
17.0653	0.000780373					22.0764	0.509491
17.0948	0.000790211					22.0846	0.504473
17.1292	0.00079681					22.0928	0.499488
17.1587	0.000758546					22.101	0.494544
17.1931	0.000750667					22.1092	0.489661
17.2226	0.000788519					22.1174	0.484834
17.252	0.000823013					22.1256	0.480015
17.2864	0.000819338					22.1338	0.47524
17.3159	0.00082301					22.142	0.470497
17.3503	0.000791577					22.1502	0.465782
17.3798	0.000813924					22.1583	0.461117
17.4142	0.000792391					22.1665	0.456501
17.4437	0.000766863					22.1747	0.451928
17.4781	0.000741657					22.1829	0.447402
17.5076	0.00073609					22.1911	0.442896
17.542	0.000704228					22.1993	0.438404
17.5714	0.000681218					22.2075	0.433969
17.6058	0.000671974					22.2157	0.429615
17.6353	0.000706439					22.2239	0.425342
17.6697	0.000672529					22.2321	0.421097
17.6992	0.000682129					22.2402	0.416875
17.7336	0.00065918					22.2484	0.41267
17.7631	0.000637828					22.2566	0.408502
17.7975	0.00061479					22.2648	0.404359
17.827	0.000600935					22.273	0.400248
17.8614	0.000574801					22.2812	0.396191
17.8908	0.000596987					22.2894	0.392157
17.9252	0.000551403					22.2976	0.388161
17.9547	0.000550103					22.3058	0.38424
17.9891	0.0005474					22.314	0.380344
18.0186	0.000569868					22.3221	0.37651
18.053	0.000580313					22.3303	0.37275
18.0825	0.000551731					22.3385	0.368989
18.1169	0.000504312					22.3467	0.365256
18.1464	0.000478161					22.3549	0.361548
18.1758	0.00046864					22.3631	0.35788
18.2102	0.000461002					22.3713	0.354245
18.2397	0.000465419					22.3795	0.350636
18.2741	0.000489011					22.3877	0.347073
18.3036	0.000482754					22.3958	0.343539
18.338	0.000476933					22.404	0.340044
18.3675	0.000453588					22.4122	0.336601
18.4019	0.00043834					22.4204	0.333194
18.4314	0.000461682					22.4286	0.329805
18.4658	0.000441384					22.4368	0.326464
18.4952	0.000425787					22.445	0.32315
18.5296	0.000416224					22.4532	0.319881
18.5591	0.000430729					22.4614	0.316642
18.5935	0.000416488					22.4696	0.31345
18.623	0.000445176					22.4777	0.3103
18.6574	0.000421088					22.4859	0.307191
18.6869	0.000411496					22.4941	0.304106
18.7213	0.000432872					22.5023	0.301073
18.7508	0.000412185					22.5105	0.298046
18.7852	0.000435871					22.5187	0.29507
18.8146	0.000475991					22.5269	0.292146
18.849	0.000451638					22.5351	0.28923
18.8785	0.000458796					22.5433	0.286365
18.9129	0.000452064					22.5515	0.283534
18.9424	0.000432968					22.5596	0.280737
18.9768	0.000422256					22.5678	0.277953
19.0063	0.00044078					22.576	0.27519
19.0407	0.000451986					22.5842	0.272476
19.0702	0.000529263					22.6006	0.267155
19.0996	0.000541747					22.6088	0.264524
19.134	0.000507881					22.617	0.261934
19.1635	0.00054992					22.6252	0.259367
19.1979	0.000584244					22.6334	0.256838
19.2274	0.000565102					22.6415	0.254341
19.2618	0.000534558					22.6497	0.251876
19.2913	0.000495693					22.6661	0.247015
19.3257	0.000472472					22.6743	0.244616
19.3552	0.000471591					22.6825	0.242247
19.3896	0.000471365					22.6907	0.239922
19.4191	0.00045493					22.7071	0.235311
19.4534	0.000431883					22.7153	0.233033
19.4829	0.000411156					22.7234	0.230793
19.5173	0.000429085					22.7398	0.226383
19.5468	0.000427783					22.748	0.224216
19.5812	0.000425453					22.7562	0.222083
19.6107	0.000428659					22.7726	0.217896
19.6451	0.00042141					22.7808	0.215839
19.6746	0.00040694					22.7971	0.211783
19.709	0.000369257					22.8053	0.209789
19.7385	0.00037913					22.8135	0.207826
19.7728	0.000367831					22.8217	0.205878
19.8023	0.000382518					22.8299	0.203961
19.8367	0.000429761					22.8463	0.200188
19.8662	0.000468335					22.8545	0.198335
19.9006	0.000428446					22.8627	0.196531
19.9301	0.00045878					22.8709	0.194765
19.9645	0.000459246					22.8872	0.191336
19.994	0.000507306					22.8954	0.18961
20.0235	0.000528048					22.9118	0.186153
20.0579	0.000463002					22.92	0.184456
20.0873	0.000445091					22.9282	0.182794
20.1217	0.000436199					22.9364	0.18116
20.1512	0.000413827					22.9528	0.177961
20.1856	0.000424007					22.9691	0.174775
20.2151	0.000432921					22.9855	0.171667
20.2495	0.000409744					23.0019	0.168614
20.279	0.000389861					23.0183	0.165624
20.3134	0.000396034					23.0265	0.164159
20.3429	0.000410014					23.0347	0.16272
20.3773	0.000431079					23.051	0.159901
20.4067	0.000423583					23.0674	0.157101
20.4411	0.000400209					23.0756	0.155703
20.4706	0.000369819					23.0838	0.154332
20.505	0.000383982					23.1002	0.15166
20.5345	0.000385562					23.1247	0.147734
20.5689	0.000371916					23.1329	0.146453
20.5984	0.000389376					23.1411	0.145183
20.6328	0.000399087					23.1575	0.142692
20.6623	0.000380924					23.1821	0.139044
20.6967	0.000346535					23.1984	0.136652
20.7261	0.000398335					23.223	0.133185
20.7605	0.000410396					23.2394	0.130922
20.79	0.000393002					23.264	0.127628
20.8244	0.000362992					23.2885	0.124415
20.8539	0.000362798					23.3131	0.121308
20.8883	0.000327565					23.3377	0.118274
20.9178	0.000344806					23.3459	0.117287
20.9522	0.00032874					23.3622	0.115345
20.9817	0.000298971					23.3868	0.112504
21.0111	0.000285635					23.395	0.111586
21.0455	0.000289671					23.4114	0.109741
21.075	0.000298916					23.436	0.10699
21.1094	0.000314386					23.4523	0.105229
21.1389	0.000422529					23.4605	0.104351
21.1733	0.000388027					23.4933	0.100901
21.2028	0.000368516					23.5015	0.100064
21.2372	0.000334063					23.5179	0.0984282
21.2667	0.000319137					23.5506	0.0952228
21.3011	0.000307194					23.5834	0.0921367
21.3305	0.000343997					23.6079	0.0899018
21.3649	0.00032382					23.6161	0.089147
21.3944	0.000299257					23.6489	0.0862838
21.4288	0.000294276					23.6571	0.0855799
21.4583	0.00029219					23.6816	0.0834857
21.4927	0.000284093					23.7144	0.0807551
21.5222	0.000281812					23.7554	0.0775356
21.5566	0.000240165					23.7635	0.0769243
21.5861	0.000229461					23.7963	0.0744595
21.6205	0.000232948					23.8209	0.0726479
21.6499	0.000211406					23.8373	0.071448
21.6843	0.000214092					23.87	0.0691125
21.7138	0.00021555					23.8782	0.0685555
21.7482	0.000274707					23.9191	0.0658348
21.7777	0.000309646					23.9273	0.0652798
21.8121	0.000282051					23.9683	0.062706
21.8416	0.00028084					23.9765	0.0622014
21.876	0.000303089					24.0174	0.0597828
21.9055	0.000284248					24.0338	0.0588746
21.935	0.000255495					24.0666	0.0569715
21.9693	0.000249086					24.0829	0.0560376
21.9988	0.000246626					24.1157	0.0542428
22.0332	0.000256706					24.1403	0.0529472
22.0627	0.000223851					24.173	0.0512722
22.0971	0.000199445					24.1894	0.0504711
22.1266	0.000264039					24.2386	0.0480635
22.161	0.00027644					24.2467	0.0476875
22.1905	0.000296294					24.2959	0.0454537
22.2249	0.000330558					24.3041	0.0450892
22.2544	0.000307577					24.3532	0.0432594
22.2888	0.000292178					24.3778	0.0422576
22.3182	0.000270546					24.4023	0.0412488
22.3526	0.000237272					24.4515	0.0393626
22.3821	0.000276639					24.5088	0.0372772
22.4165	0.000306589					24.5334	0.036418
22.446	0.000284036					24.558	0.0355618
22.4804	0.000253168					24.6153	0.0337875
22.5099	0.00024406					24.6235	0.0335499
22.5443	0.000223528					24.6644	0.0322767
22.5738	0.000220717					24.7217	0.0305722
22.6082	0.000198749					24.7709	0.029156
22.6376	0.000162883					24.8282	0.0276667
22.672	0.000169549					24.8774	0.026442
22.7015	0.000186743					24.9347	0.0249865
22.7359	0.000160678					24.9429	0.0247803
22.7654	0.000158567					24.9838	0.0238203
22.7998	0.000162985					25.0412	0.0225194
22.8293	0.000181611					25.0739	0.0217765
22.8588	0.000208309					25.0903	0.0214253
22.8932	0.000181674					25.1476	0.0201674
22.9226	0.000184107					25.1968	0.0191358
22.957	0.000166369					25.2131	0.0187923
22.9865	0.000138126					25.2459	0.0181483
23.0209	0.00012047					25.3032	0.0170198
23.0504	0.000109885					25.3524	0.0162596
23.0848	0.000154335					25.3769	0.0158064
23.1143	0.000182896					25.4097	0.0152813
23.1487	0.000182513					25.4588	0.0145541
23.1782	0.000180108					25.5162	0.0136543
23.2126	0.000200337					25.5653	0.0129649
23.242	0.000204257					25.6226	0.0121485
23.2764	0.000199383					25.6718	0.0115471
23.3059	0.000203602					25.7291	0.010819
23.3403	0.000217077					25.7782	0.0102243
23.3698	0.000210658					25.8028	0.00995695
23.4042	0.000202964					25.8356	0.00964739
23.4337	0.000182894					25.8847	0.00910087
23.4681	0.000144101					25.942	0.00865641
23.4976	0.00013591					25.9912	0.00818003
23.532	0.000135477					26.0485	0.00768862
23.5614	0.000120404					26.0976	0.00731187
23.5958	0.000114821					26.1386	0.00703464
23.6253	0.000108349					26.1468	0.00697732
23.6597	9.31105e-05					26.2041	0.00661792
23.6892	9.15096e-05					26.2532	0.00625854
23.7236	9.72233e-05					26.3106	0.00594797
23.7531	0.000103726					26.3597	0.00572661
23.7826	0.000104048					26.417	0.00540906
23.817	0.000118826					26.4662	0.00533831
23.8464	0.00024812					26.5235	0.00500738
23.8808	0.000258232					26.5726	0.00486902
23.9103	0.000245833					26.63	0.0046287
23.9447	0.000231062					26.6791	0.00438938
23.9742	0.000211465					26.7364	0.00441462
24.0086	0.000207797					26.7856	0.00422786
24.0381	0.000185492					26.8347	0.00410412
24.0725	0.000190463					26.8429	0.00406565
24.102	0.000184992					26.892	0.00386712
24.1364	0.000162172					26.9494	0.0036297
24.1658	0.000134281					26.9985	0.00346907
24.2002	0.000111875					27.0476	0.00334134
24.2297	9.96559e-05					27.105	0.00316814
24.2641	0.000167967					27.1541	0.00308085
24.2936	0.000138812					27.2114	0.00289342
24.328	0.000114009					27.2606	0.00285506
24.3575	0.000103152					27.3179	0.00272202
24.3919	9.05619e-05					27.367	0.00264406
24.4214	0.000111753					27.4244	0.00270849
24.4558	0.000178121					27.4735	0.002685
24.4853	0.000195765					27.5308	0.00259704
24.5196	0.000190721					27.58	0.00260185
24.5491	0.000168561					27.6373	0.00250244
24.5835	0.00011673					27.6865	0.00249585
24.613	0.000105571					27.7438	0.0024038
24.6474	0.000113059					27.7929	0.00232358
24.6769	0.000103874					27.8421	0.00231645
24.7064	0.0001247					27.8994	0.00229395
24.7408	0.000117539					27.9485	0.00220982
24.7703	0.000102034					28.0059	0.00210353
24.8047	0.000110433					28.055	0.00207052
24.8341	0.000116261					28.1123	0.00199231
24.8685	0.000174286					28.1615	0.00193949
24.898	0.000179379					28.2188	0.00186064
24.9324	0.000208009					28.2679	0.00181297
24.9619	0.000193122					28.3253	0.00179701
24.9963	0.000165115					28.3744	0.00194763
25.0258	0.00015457					28.4317	0.0018538
25.0602	0.000146022					28.4809	0.00184821
25.0897	0.000113933					28.5382	0.00185641
25.1241	8.07263e-05					28.5873	0.00180633
25.1535	5.70193e-05					28.6447	0.00175008
25.1879	8.71511e-05					28.6938	0.00170495
25.2174	6.2733e-05					28.7429	0.00165972
25.2518	6.76282e-05					28.8003	0.00164886
25.2813	8.65661e-05					28.8494	0.00156798
25.3157	0.00011508					28.9067	0.00174219
25.3452	0.000157267					28.9559	0.00172479
25.3796	0.000159133					29.0132	0.00176047
25.4091	0.000164442					29.0623	0.0016559
25.4435	0.000132172					29.1197	0.00158029
25.4729	0.00010957					29.1688	0.00160142
25.5073	9.28196e-05					29.2261	0.00171088
25.5368	9.01172e-05					29.2753	0.00172625
25.5712	0.000100927					29.3326	0.00163742
25.6007	6.64382e-05					29.3817	0.00161495
25.6302	3.72054e-05					29.4391	0.00152175
25.6646	1.39221e-05					29.4882	0.00149044
25.6941	9.75401e-06					29.5455	0.001518
25.7285	5.23603e-05					29.5947	0.00147956
25.7579	4.3342e-05					29.6438	0.00148674
25.7923	4.94298e-05					29.7011	0.00156861
25.8218	4.01315e-05					29.7503	0.00152461
25.8562	5.55275e-05					29.8076	0.00142034
25.8857	5.74378e-05					29.8567	0.00139088
25.9201	0.000126669					29.9141	0.00134418
25.9496	0.00012299					29.9632	0.00137179
25.984	0.000109036					30.0205	0.00147706
26.0135	0.000121068					30.0697	0.00136473
26.0479	0.000169978					30.127	0.00138337
26.0773	0.000184854					30.1761	0.00130585
26.1117	0.000153545					30.2335	0.00128392
26.1412	0.00018154					30.2826	0.00122285
26.1756	0.000196883					30.3399	0.00119369
26.2051	0.000196619					30.3891	0.00118027
26.2395	0.000164975					30.3973	0.00117573
26.269	0.000165748					30.4382	0.00115498
26.3034	0.000165857					30.4955	0.00112285
26.3329	0.000143423					30.5447	0.00111994
26.3673	0.000122885					30.602	0.0011344
26.3967	0.000140112					30.6512	0.00107956
26.4311	0.000138658					30.7085	0.00105092
26.4606	0.000104629					30.7576	0.000985089
26.495	0.000129992					30.8149	0.00104743
26.5245	0.000111524					30.8641	0.000993106
26.5589	0.000130761					30.9214	0.000944535
26.5884	0.000176223					30.9706	0.000909881
26.6179	0.000173932					31.0279	0.000909308
26.6523	0.000135879					31.077	0.000887151
26.6818	9.31234e-05					31.1343	0.000932347
26.7161	7.99937e-05					31.1835	0.000898663
26.7456	8.83486e-05					31.2408	0.000855186
26.78	0.00011581					31.29	0.000801335
26.8095	0.00015667					31.3391	0.000754218
26.8439	0.000128106					31.3964	0.000841566
26.8734	0.000108286					31.4456	0.000805088
26.9078	8.28046e-05					31.5029	0.000795618
26.9373	6.18596e-05					31.552	0.00079726
26.9717	6.21724e-05					31.6094	0.000730148
27.0012	5.87508e-05					31.6585	0.000829603
27.0355	6.8061e-05					31.7158	0.000977008
27.065	3.24974e-05					31.765	0.000967399
27.0994	5.04012e-06					31.8223	0.000984065
27.1289	-2.04385e-05					31.8714	0.00101911
27.1633	-5.66596e-06					31.9288	0.000957656
27.1928	1.39975e-05					31.9779	0.000969782
27.2272	-1.05002e-05					32.0352	0.000980158
27.2567	-3.75714e-05					32.0844	0.00094156
27.2911	-4.19931e-05					32.1417	0.000877891
27.3206	-6.64451e-05					32.1908	0.000825211
27.355	-7.26464e-05					32.24	0.000765612
27.3844	-7.66363e-05					32.2973	0.000764069
27.4188	-5.64081e-05					32.3464	0.000772854
27.4483	-5.59405e-05					32.4038	0.000762144
27.4827	-4.73366e-06					32.4529	0.000786082
27.5122	-2.32658e-06					32.5102	0.000732668
27.5417	-3.42739e-05					32.5594	0.000711717
27.5761	-1.38912e-05					32.6167	0.000692391
27.6056	-8.64477e-06					32.6658	0.000655545
27.64	3.44093e-06					32.7232	0.000705125
27.6694	-2.34758e-05					32.7723	0.000800127
27.7038	3.84774e-05					32.8296	0.000813555
27.7333	4.00849e-05					32.8788	0.000771382
27.7677	3.83241e-05					32.9361	0.000748274
27.7972	5.40857e-05					32.9852	0.000828992
27.8316	0.00010405					33.0344	0.000974308
27.8611	7.80933e-05					33.0917	0.000982836
27.8955	6.66421e-05					33.1408	0.000971526
27.925	5.93923e-05					33.1982	0.00107765
27.9594	4.22923e-05					33.2473	0.00114354
27.9888	3.85597e-05					33.2555	0.00118807
28.0232	2.88427e-05					33.3046	0.00122885
28.0527	6.26742e-05					33.3292	0.00116305
28.0871	1.95636e-05					33.3538	0.00112282
28.1166	1.82438e-05					33.4111	0.00102733
28.151	-3.04127e-05					33.4602	0.000992711
28.1805	-5.18308e-05					33.5176	0.000929037
28.2149	-4.52767e-05					33.5667	0.00100619
28.2444	-3.12854e-05					33.624	0.000889264
28.2788	3.12306e-06					33.6732	0.000803171
28.3082	7.49222e-06					33.7305	0.000779549
28.3426	-3.86553e-06					33.7797	0.000797126
28.3721	-1.28981e-05					33.837	0.000815949
28.4065	-7.29135e-06					33.8861	0.000754529
28.436	-1.86808e-05					33.9353	0.000728101
28.4655	-1.30654e-05					33.9926	0.000656961
28.4999	-5.11139e-05					34.0417	0.000609487
28.5294	-5.41491e-05					34.0991	0.000521764
28.5638	-4.01579e-05					34.1482	0.000488732
28.5932	-7.95214e-06					34.2055	0.000479804
28.6276	8.7693e-05					34.2547	0.000497764
28.6571	7.16284e-05					34.312	0.000524845
28.6915	4.22553e-05					34.3611	0.000551169
28.721	1.5262e-05					34.4185	0.000707557
28.7554	7.21871e-05					34.4676	0.000766116
28.7849	5.96267e-05					34.5249	0.000725214
28.8193	4.83884e-05					34.5741	0.000673234
28.8488	3.46179e-05					34.6314	0.00064891
28.8832	8.89905e-06					34.6805	0.000822755
28.9126	-1.53858e-05					34.7379	0.000752315
28.947	-3.22656e-05					34.787	0.000687404
28.9765	-3.20001e-06					34.8361	0.00057532
29.0109	6.55558e-05					34.8935	0.000483525
29.0404	3.75873e-05					34.9426	0.000441704
29.0748	1.6479e-05					34.9999	0.00037956
29.1043	3.25895e-05					35.0491	0.000354169
29.1387	2.12926e-05					35.1064	0.000411992
29.1682	2.51002e-05					35.1555	0.000361706
29.2026	3.18584e-05					35.2129	0.000355476
29.2321	-3.88709e-06					35.262	0.000298011
29.2664	-2.28077e-05					35.3193	0.000257074
29.2959	-6.36133e-06					35.3685	0.000260673
29.3303	1.9475e-06					35.4258	0.000293982
29.3598	-5.09989e-06					35.4749	0.000457734
29.3893	-1.22949e-05					35.5323	0.000425477
29.4237	-1.06482e-05					35.5814	0.000427309
29.4532	-9.41915e-06					35.6305	0.000365612
29.4876	-8.14072e-06					35.6879	0.000331185
29.5171	-7.2217e-06					35.737	0.000319132
-0.858544		0.00252658				35.7943	0.000310104
-0.837491		0.00238585				35.8435	0.000318862
-0.805912		0.00220199				35.9008	0.000292267
-0.774332		0.00205425				35.9499	0.000235496
-0.742753		0.00185926				36.0073	0.000276214
-0.711174		0.00181866				36.0564	0.000216051
-0.679595		0.00175976				36.1137	0.000266771
-0.648016		0.00171911				36.1629	0.000213464
-0.616436		0.00171946				36.2202	0.000219219
-0.584857		0.00173255				36.2693	0.000267579
-0.553278		0.00173944				36.3267	0.000213257
-0.521699		0.00171006				36.3758	0.000174286
-0.49012		0.00165706				36.4331	0.000151188
-0.45854		0.00154311				36.4823	0.000142236
-0.426961		0.00154346				36.5314	0.000111618
-0.395382		0.00153223				36.5887	0.000134353
-0.363803		0.0014489				36.6379	0.000147285
-0.332224		0.00143615				36.6952	0.00018494
-0.300644		0.00140919				36.7444	0.000115843
-0.269065		0.00132575				36.8017	0.000167239
-0.232223		0.00133156				36.8508	0.000171108
-0.200644		0.00134485				36.9081	0.00017147
-0.169064		0.0014115				36.9573	9.53223e-05
-0.137485		0.00152683				37.0146	3.34867e-05
-0.105906		0.00140715				37.0638	-1.06932e-07
-0.0743269		0.00133921				37.1211	-2.19585e-05
-0.0427477		0.00128616				37.1702	2.92977e-05
-0.0111685		0.00128981				37.2275	1.01454e-05
0.0204107		0.00132862				37.2767	3.67025e-05
0.0519899		0.00136626				37.334	5.17418e-06
0.0835691		0.00134799				37.3832	-3.63244e-05
0.104622		0.00127024				37.4323	-6.15831e-05
0.115148		0.0012565				37.4896	-1.5755e-05
0.146728		0.00125037				37.5388	4.99079e-05
0.178307		0.00122757				37.5961	-2.02995e-05
0.209886		0.00122778				37.6452	-3.52812e-05
0.241465		0.00120799				37.7026	-6.42442e-05
0.273044		0.00111318				37.7517	-4.24137e-05
0.304624		0.000980132				37.809	-4.34576e-05
0.336203		0.00100109				37.8582	-8.56652e-05
0.373045		0.00117101				37.9155	-7.90185e-05
0.404624		0.00126849				37.9646	-7.66396e-05
0.436204		0.0012353				38.022	-6.82819e-05
0.467783		0.00108766				38.0711	-0.000101438
0.499362		0.000949462				38.1284	-0.000164537
0.530941		0.000749354				38.1776	1.62257e-05
0.56252		0.000700586				38.2267	8.79705e-06
0.5941		0.000550333				38.284	-2.53498e-05
0.625679		0.000461132				38.3332	-5.06117e-05
0.657258		0.000558283				38.3905	-9.46875e-05
0.688837		0.000606189				38.4396	-0.000135625
0.720416		0.000573441				38.497	-0.000144057
0.751996		0.000509222				38.5461	-0.000139412
0.783575		0.000461307				38.6034	-0.000190063
0.815154		0.000487785				38.6526	-0.000188864
0.846733		0.000483773				38.7099	-0.000173895
0.878312		0.000487517				38.759	-0.000127212
0.909892		0.000488274				38.8164	-7.6501e-05
0.941471		0.000445146				38.8655	-0.000102678
0.978313		0.000407237				38.9228	-9.64004e-05
1.00989		0.000352159				38.972	-0.0001045
1.04147		0.000299269				39.0293	-0.000142592
1.07305		0.000251852				39.0784	-0.000193332
1.10463		0.000217427				39.1276	-0.000192645
1.13621		0.000193784				39.1849	-0.000224883
1.16779		0.000156715				39.234	-0.000198256
1.19937		6.4131e-05				39.2914	-0.000162433
1.23095		-2.12186e-06				39.3405	-9.60762e-05
1.26253		-8.60168e-06				39.3978	-5.94579e-05
1.29411		3.84278e-05				39.447	-5.62258e-05
1.32568		5.37449e-05				39.5043	-9.22296e-06
1.35726		0.000130498				39.5534	-4.45368e-06
1.38884		0.00011308				39.6108	1.19273e-05
1.42042		1.98819e-05				39.6599	1.46232e-06
1.452		1.01555e-05				39.7172	-1.76298e-05
1.48358		-0.000155197				39.7664	-3.67169e-05
1.51516		-0.000177498				39.8237	-7.94209e-06
1.54674		-0.000131807				39.8728	-1.92434e-05
1.58358		3.57533e-05				39.9302	-3.00885e-05
1.61516		0.000110801				39.9793	-8.14324e-06
1.64674		8.39716e-05				40.0285	-3.04862e-05
1.67832		5.14884e-05				40.0858	-6.48822e-05
1.7099		3.64904e-05				40.1349	-9.58358e-05
1.74148		-4.59896e-05				40.1923	-0.000143738
1.77306		-3.43551e-05				40.2414	-0.000123049
1.80464		4.6119e-05				40.2987	-0.000180192
1.83621		0.000140507				40.3479	-0.00011062
1.86779		0.000245484				40.4052	-0.000197133
1.89937		0.000323563				40.4543	-0.000206284
1.93095		0.000455367				40.5117	-0.00017858
1.96253		0.000641474				40.5608	-0.000192745
1.99411		0.000727642				40.6181	-0.000211995
2.02569		0.000685277				40.6673	-0.000270063
2.05727		0.000579529				40.7246	-0.000249049
2.08885		0.000543058				40.7737	-0.000270864
2.12043		0.00057042				40.8229	-0.000267792
2.15201		0.000749039				40.8802	-0.000252549
2.18885		0.000884098				40.9293	-0.000194524
2.22043		0.000996469				40.9867	-0.000202952
2.25201		0.00116169				41.0358	-0.00024623
2.27832		0.00132019				41.0931	-0.0002839
2.28359		0.00136455				41.1423	-0.000222445
2.31517		0.00159975				41.1996	-0.000243573
2.34675		0.0017925				41.2487	-0.00024315
2.37832		0.00175386				41.3061	-0.000233858
2.4099		0.0018063				41.3552	-0.000201413
2.44148		0.00200308				41.4125	-0.000237548
2.47306		0.00220817				41.4617	-0.000253761
2.50464		0.00235579				41.519	-0.000238144
2.53622		0.00241245				41.5681	-0.000247098
2.5678		0.0025707				41.6255	-0.000253005
2.59938		0.00271532				41.6746	-0.000295971
2.63096		0.00283575				41.7237	-0.000272518
2.66254		0.0030673				41.7811	-0.000306232
2.69412		0.00323509				41.8302	-0.000318687
2.7257		0.00338896				41.8875	-0.000316177
2.75727		0.00349674				41.9367	-0.000250455
2.79412		0.00363287				41.994	-0.000254113
2.8257		0.00379076				42.0431	-0.000251345
2.85728		0.00395201				42.1005	-0.000264451
2.88885		0.00414325				42.1496	-0.000310577
2.89412		0.00416906				42.2069	-0.000326246
2.92043		0.00432434				42.2561	-0.000390812
2.95201		0.00441823				42.3134	-0.000410412
2.98359		0.00445649				42.3625	-0.000391514
3.01517		0.00449807				42.4199	-0.0003771
3.04675		0.00462674				42.469	-0.000392797
3.07833		0.00468403				42.5263	-0.000303574
3.10991		0.00478826				42.5755	-0.0003496
3.14149		0.00489893				42.6246	-0.00030732
3.17307		0.00489522				42.6819	-0.000268514
3.20465		0.00484556				42.7311	-0.000237201
3.23623		0.00472839				42.7884	-0.000291826
3.26781		0.00465926				42.8376	-0.000323777
3.29938		0.00464721				42.8949	-0.000335711
3.33096		0.00462845				42.944	-0.000275153
3.36254		0.00468559				43.0013	-0.000260955
3.39939		0.00470725				43.0505	-0.000258885
3.43096		0.00462269				43.1078	-0.000242683
3.46254		0.00455005				43.157	-0.000279353
3.49412		0.00444072				43.2143	-0.000284036
3.5257		0.00433389				43.2634	-0.000267147
3.55728		0.0042842				43.3207	-0.000250753
3.58886		0.00423894				43.3699	-0.000332267
3.62044		0.00423163				43.419	-0.000375697
3.65202		0.00417635				43.4764	-0.000366941
3.65728		0.00415854				43.5255	-0.000382213
3.6836		0.00405108				43.5828	-0.000349641
3.71518		0.00397833				43.632	-0.000244663
3.74676		0.00387884				43.6893	-0.00022649
3.77834		0.00375432				43.7384	-0.000232693
3.80991		0.00360136				43.7958	-0.000213452
3.84149		0.00338604				43.8449	-0.000311671
3.87307		0.00319553				43.9022	-0.000344054
3.90465		0.00305144				43.9514	-0.000364988
3.93623		0.00305199				44.0087	-0.000396582
3.96781		0.00295785				44.0578	-0.000393928
4.00465		0.00293545				44.1152	-0.000363125
4.03623		0.00293658				44.1643	-0.000321618
4.06781		0.00290113				44.2216	-0.000329147
4.09939		0.00279576				44.2708	-0.000362018
4.13097		0.00260609				44.3199	-0.00030074
4.16255		0.00245364				44.3772	-0.000290731
4.19413		0.00241747				44.4264	-0.000290929
4.22571		0.00235109				44.4837	-0.000348855
4.25729		0.00237768				44.5328	-0.000342241
4.28887		0.00229949				44.5902	-0.000364599
4.32045		0.00214383				44.6393	-0.000380895
4.35202		0.00205228				44.6966	-0.000418807
4.3836		0.00190924				44.7458	-0.000430831
4.41518		0.00187412				44.8031	-0.000473305
4.44676		0.00174702				44.8522	-0.000487149
4.47834		0.00153729				44.9096	-0.000532134
4.50992		0.00143774				44.9587	-0.000526105
4.5415		0.00140712				45.016	-0.000478094
4.57308		0.00155616				45.0652	-0.000452042
4.60992		0.00163076				45.1225	-0.000377386
4.6415		0.00153033				45.1716	-0.000379637
4.67308		0.00148498				45.2208	-0.000383963
4.70466		0.00144921				45.2781	-0.00040421
4.73624		0.00144949				45.3272	-0.000454689
4.76782		0.00137355				45.3846	-0.000455758
4.79413		0.00125538				45.4337	-0.000436654
4.7994		0.00122819				45.491	-0.000501077
4.83098		0.00120979				45.5402	-0.00048589
4.86255		0.00116833				45.5975	-0.000507746
4.89413		0.00112992				45.6466	-0.00051115
4.92571		0.0011134				45.704	-0.000403184
4.95729		0.00108093				45.7531	-0.000447458
4.98887		0.00116447				45.8104	-0.000404426
5.02045		0.00104245				45.8596	-0.000400783
5.05203		0.000862105				45.9169	-0.000362461
5.08361		0.000734453				45.966	-0.000437105
5.11519		0.000709216				46.0152	-0.000434823
5.14677		0.000717902				46.0725	-0.000461008
5.17835		0.000729161				46.1217	-0.000455345
5.21519		0.000797683				46.179	-0.000445092
5.24677		0.000810164				46.2281	-0.00046238
5.27835		0.000775881				46.2855	-0.000481134
5.30993		0.000841737				46.3346	-0.000526648
5.34151		0.000829978				46.3919	-0.000567195
5.37309		0.000812644				46.4411	-0.000624622
5.40466		0.000844188				46.4984	-0.000579697
5.43624		0.000792231				46.5475	-0.000605587
5.46782		0.000898094				46.6049	-0.000551983
5.4994		0.000958141				46.654	-0.000549903
5.53098		0.000977524				46.7113	-0.00047731
5.56256		0.000873556				46.7605	-0.000539337
5.59414		0.000729314				46.8178	-0.000529208
5.62572		0.000735015				46.8669	-0.000565936
5.6573		0.000722498				46.9161	-0.000596917
5.68888		0.000755455				46.9734	-0.000591827
5.72046		0.000828553				47.0225	-0.000555443
5.75204		0.00081487				47.0799	-0.000573549
5.78361		0.000784314				47.129	-0.000566899
5.82046		0.000720609				47.1863	-0.000580521
5.85204		0.00056632				47.2355	-0.000607104
5.88362		0.000490311				47.2928	-0.000632157
5.91519		0.000520449				47.3419	-0.000618832
5.94677		0.000602996				47.3993	-0.000620879
5.97835		0.000500517				47.4484	-0.000609041
6.00993		0.00031098				47.5057	-0.000525019
6.04151		0.000277321				47.5549	-0.000573035
6.07309		0.00039238				47.6122	-0.000525254
6.10467		0.000400991				47.6613	-0.000487756
6.13625		0.000250025				47.7187	-0.000455178
6.16783		9.62387e-05				47.7678	-0.000494541
6.19941		-0.000101539				47.8169	-0.000463487
6.23099		-0.000389647				47.8743	-0.000473881
6.26257		-0.000548181				47.9234	-0.00046318
6.29415		-0.000593783				47.9807	-0.000426693
6.32572		-0.000606905				48.0299	-0.000460298
6.3573		-0.000555726				48.0872	-0.000504011
6.38888		-0.00050409				48.1363	-0.00052206
6.42573		-0.000470884				48.1937	-0.000583239
6.4573		-0.000516165				48.2428	-0.000583174
6.48888		-0.000647466				48.3001	-0.000605597
6.52046		-0.000723673				48.3493	-0.00059289
6.55204		-0.000888806				48.4066	-0.00056388
6.58362		-0.00109731				48.4557	-0.000603084
6.6152		-0.00129495				48.5131	-0.000536977
6.64678		-0.00137237				48.5622	-0.000398046
6.67836		-0.00133912				48.6113	-0.000318632
6.70994		-0.0013356				48.6687	-0.000260538
6.74152		-0.00130545				48.7178	-0.000176492
6.7731		-0.00132943				48.7751	-0.000233494
6.80468		-0.00139965				48.8243	-0.000285374
6.83625		-0.00141473				48.8816	-0.000220689
6.86783		-0.00147653				48.9308	-0.000224386
6.89941		-0.00140135				48.9881	-0.000226161
6.93099		-0.00135153				49.0372	-0.000199868
6.96257		-0.00145594				49.0945	-0.000173009
6.99415		-0.00158475				49.1437	-0.0001529
6.99941		-0.00161645				49.201	-0.000132365
7.03099		-0.00163791				-1.43091		0.000832279
7.03626		-0.00160445				-1.39582		0.000717923
7.06257		-0.0015299				-1.34319		0.000550223
7.09415		-0.00134715				-1.29055		0.000516917
7.12573		-0.00109031				-1.23792		0.000458872
7.15731		-0.000732791				-1.18529		0.000375048
7.18889		-0.000277226				-1.13266		0.000400219
7.22047		0.000346875				-1.08003		0.00029385
7.25205		0.00129192				-1.02739		8.31372e-05
7.28363		0.0022859				-0.974762		-5.28694e-06
7.31521		0.00347789				-0.92213		-4.54731e-05
7.33626		0.00428057				-0.869498		2.10093e-05
7.34679		0.00472785				-0.816866		0.000100798
7.37836		0.00616089				-0.764234		0.000179211
7.39942		0.00731408				-0.711602		0.0003134
7.40994		0.00794802				-0.65897		0.000323191
7.44152		0.0096744				-0.606338		0.000233543
7.44679		0.00994046				-0.553706		0.000130732
7.4731		0.0112834				-0.501074		5.72576e-05
7.50468		0.0129947				-0.448442		4.43419e-06
7.53626		0.014774				-0.39581		-2.84972e-05
7.55731		0.0160295				-0.343178		-4.47997e-05
7.56784		0.0166554				-0.290546		-2.65786e-05
7.59942		0.0183266				-0.237914		-5.37938e-05
7.60468		0.0186245				-0.185282		-9.94852e-05
7.63626		0.0204264				-0.13265		-8.52716e-05
7.65731		0.0216322				-0.071246		-3.98316e-05
7.66784		0.0222617				-0.018614		-0.000128982
7.69942		0.0241057				0.034018		-0.000261119
7.70468		0.0244013				0.08665		-0.000214856
7.731		0.0258736				0.139282		-0.000222899
7.76258		0.027398				0.191914		-0.000152683
7.79416		0.0288791				0.244546		-0.000169008
7.82047		0.0301624				0.297178		-0.000204797
7.82574		0.0304425				0.34981		-0.000161932
7.85732		0.0322598				0.402442		-0.000110335
7.87311		0.0331974				0.455074		-8.45429e-05
7.88889		0.0342068				0.507706		-9.74401e-05
7.91521		0.0358818				0.560338		-4.16296e-05
7.92047		0.0362945				0.61297		-5.22605e-05
7.95205		0.038465				0.665602		-0.00016863
7.95732		0.0388112				0.718234		-0.000229164
7.98363		0.0405169				0.770866		-0.000210937
8.00469		0.0418557				0.823498		-0.000140475
8.01521		0.042493				0.87613		-0.000147816
8.04679		0.0445425				0.928762		-0.000226615
8.07837		0.0464647				0.981394		-0.000258117
8.09416		0.0474304				1.03403		-0.000294387
8.10995		0.0483816				1.08666		-0.000299054
8.14153		0.0503044				1.13929		-0.000178263
8.17311		0.0521985				1.19192		-4.33848e-05
8.19416		0.0533377				1.25333		-4.88074e-06
8.20469		0.0539181				1.30596		1.10205e-05
8.24153		0.0558319				1.35859		3.67271e-05
8.24679		0.0561209				1.41122		9.99157e-05
8.27311		0.0574635				1.46385		0.00019629
8.30469		0.059067				1.51649		0.000277797
8.33627		0.0604402				1.56912		0.000247073
8.36785		0.0617287				1.62175		0.000117663
8.37311		0.061915				1.67438		3.3171e-05
8.39943		0.0628204				1.72701		9.9692e-06
8.431		0.0641469				1.77965		8.34731e-05
8.44679		0.0649004				1.83228		0.000234313
8.46258		0.0657174				1.88491		0.000275076
8.49416		0.0673564				1.93754		0.000254258
8.49943		0.0676529				1.99017		9.71567e-05
8.52574		0.0692308				2.04281		2.17265e-05
8.54679		0.0705338				2.09544		2.697e-05
8.55732		0.0712308				2.14807		2.9716e-05
8.5889		0.0735183				2.2007		3.81746e-05
8.62048		0.075996				2.25333		-2.21503e-05
8.62574		0.0764864				2.30597		-9.57904e-06
8.65206		0.0791982				2.3586		3.18716e-05
8.67837		0.0824895				2.41123		9.75305e-05
8.68364		0.0832105				2.46386		6.94493e-05
8.69943		0.0855419				2.51649		4.71052e-05
8.71522		0.0882912				2.5779		7.13409e-05
8.73101		0.0915777				2.63053		4.2038e-05
8.74153		0.0940592				2.68316		-9.24734e-05
8.7468		0.0953848				2.73579		-0.000183619
8.75206		0.0967903				2.78843		-0.000244909
8.76259		0.099753				2.84106		-0.000167295
8.77311		0.103067				2.89369		-4.52137e-05
8.77838		0.104847				2.94632		-1.78424e-05
8.78364		0.10672				2.99895		0.000117873
8.7889		0.108664				3.05159		0.00021948
8.79943		0.112772				3.10422		0.000204627
8.80469		0.114958				3.15685		0.000232035
8.80995		0.11721				3.20948		0.000285443
8.81522		0.119564				3.26211		0.000231182
8.82574		0.124674				3.31475		6.68092e-05
8.83101		0.127422				3.36738		-9.78417e-06
8.83627		0.130272				3.42001		9.74701e-05
8.84153		0.133212				3.47264		0.000190226
8.8468		0.136282				3.52527		0.000292865
8.85206		0.139498				3.57791		0.00033811
8.85732		0.142833				3.63054		0.000434797
8.86259		0.146293				3.68317		0.000551816
8.86785		0.149921				3.7358		0.000665229
8.87311		0.153734				3.78843		0.000766449
8.87838		0.15773				3.84107		0.000891639
8.88364		0.161873				3.90247		0.00110715
8.8889		0.166164				3.93756		0.00118731
8.89417		0.170633				3.9551		0.00123363
8.89943		0.175268				4.00773		0.00133793
8.90469		0.180074				4.06037		0.0015597
8.90996		0.185041				4.113		0.00176975
8.91522		0.190181				4.16563		0.0018954
8.92048		0.195476				4.21826		0.0020298
8.92575		0.200965				4.27089		0.00216654
8.93101		0.206739				4.32353		0.00233423
8.93627		0.212794				4.37616		0.00239317
8.94153		0.218839				4.42879		0.00252659
8.9468		0.224909				4.48142		0.00270885
8.95206		0.23131				4.53405		0.00277893
8.95732		0.238145				4.58669		0.00286483
8.96259		0.245367				4.63932		0.00288287
8.96785		0.25258				4.69195		0.00291855
8.97311		0.259771				4.74458		0.00306959
8.97838		0.267167				4.79721		0.00323917
8.98364		0.274804				4.84985		0.00347517
8.9889		0.282694				4.90248		0.00353231
8.99417		0.290822				4.95511		0.00358444
8.99943		0.299072				5.00774		0.00361481
9.00469		0.307373				5.06037		0.00360434
9.00996		0.315794				5.11301		0.00379164
9.01522		0.324366				5.16564		0.00394362
9.02048		0.333086				5.22704		0.00412437
9.02575		0.342023				5.23581		0.00413472
9.03101		0.351221				5.27967		0.00414001
9.03627		0.360637				5.29722		0.0041288
9.04154		0.370239				5.33231		0.00407289
9.0468		0.3801				5.38494		0.00407944
9.05206		0.390119				5.43757		0.00409982
9.05733		0.400142				5.4902		0.00405536
9.06259		0.410247				5.54283		0.003971
9.06785		0.420489				5.59547		0.00385889
9.07311		0.430757				5.6481		0.00381274
9.07838		0.441085				5.70073		0.00376307
9.08364		0.45161				5.75336		0.00378857
9.0889		0.46233				5.80599		0.00384113
9.09417		0.473237				5.85863		0.00386224
9.09943		0.484232				5.91126		0.00385645
9.10469		0.495201				5.96389		0.00375519
9.10996		0.506213				6.01652		0.003602
9.11522		0.517232				6.06915		0.00356217
9.12048		0.528263				6.12179		0.00348578
9.12575		0.53933				6.17442		0.00349258
9.13101		0.55046				6.22705		0.00344559
9.13627		0.561808				6.27968		0.00330982
9.14154		0.573401				6.33231		0.00324579
9.1468		0.584977				6.38495		0.00322014
9.15206		0.596412				6.43758		0.00319582
9.15733		0.607753				6.49021		0.00312118
9.16259		0.618874				6.55161		0.00297727
9.16785		0.629932				6.60425		0.00288874
9.17312		0.640955				6.65688		0.0027532
9.17838		0.651798				6.70951		0.00262931
9.18364		0.662579				6.76214		0.00260861
9.18891		0.673252				6.81477		0.00253255
9.19417		0.684046				6.86741		0.00245977
9.19943		0.695372				6.92004		0.00238628
9.20469		0.706609				6.97267		0.0023568
9.20996		0.717425				7.0253		0.00224496
9.21522		0.727996				7.07793		0.00207611
9.22048		0.738424				7.13057		0.00199204
9.22575		0.748831				7.1832		0.00199918
9.23101		0.759012				7.23583		0.00196839
9.23627		0.769069				7.28846		0.0018921
9.24154		0.779151				7.34109		0.00174217
9.2468		0.789161				7.39373		0.00160666
9.25206		0.799002				7.44636		0.00148433
9.25733		0.808651				7.49899		0.00142886
9.26259		0.818032				7.55162		0.00139853
9.26785		0.827088				7.60425		0.00136604
9.27312		0.835902				7.65689		0.00139191
9.27838		0.844562				7.70952		0.001452
9.28364		0.852971				7.76215		0.00148836
9.28891		0.861166				7.81478		0.00142521
9.29417		0.869251				7.87619		0.00122286
9.29943		0.877207				7.89373		0.0011624
9.3047		0.884987				7.92882		0.00105478
9.30996		0.89253				7.98145		0.000864149
9.31522		0.89979				8.03408		0.000661474
9.32049		0.906685				8.08671		0.000625796
9.32575		0.913263				8.13935		0.000618298
9.33101		0.919595				8.19198		0.000653862
9.33627		0.92571				8.24461		0.000564856
9.34154		0.931595				8.29724		0.000440097
9.3468		0.937227				8.34987		0.000311491
9.35206		0.942627				8.40251		0.000244963
9.35733		0.947799				8.45514		0.000291571
9.36259		0.95279				8.50777		0.000290449
9.36785		0.957524				8.5604		0.000255189
9.37312		0.961911				8.61303		0.00026844
9.37838		0.96608				8.66567		0.000189463
9.38364		0.97006				8.7183		6.79882e-05
9.38891		0.973739				8.77093		-5.07003e-05
9.39417		0.977156				8.82356		5.08361e-06
9.39943		0.980363				8.87619		-2.38771e-06
9.4047		0.983367				8.92883		-3.86894e-05
9.40996		0.986135				8.98146		-5.53443e-06
9.41522		0.98866				9.03409		-9.01816e-05
9.42049		0.990963				9.08672		-0.00019719
9.42575		0.992949				9.13935		-0.000274988
9.43628		0.996247				9.20076		-0.000366911
9.45207		0.999183				9.25339		-0.000315381
9.48364		0.999312				9.30602		-0.000324584
9.49417		0.997613				9.35866		-0.000328704
9.5047		0.994938				9.41129		-0.000290126
9.51522		0.991516				9.46392		-0.000329484
9.52049		0.989642				9.51655		-0.000363357
9.53101		0.985459				9.56918		-0.000410762
9.53628		0.983105				9.62182		-0.000502255
9.54154		0.980599				9.67445		-0.000538372
9.5468		0.977923				9.72708		-0.000550564
9.55207		0.975046				9.77971		-0.000533815
9.55733		0.971991				9.83234		-0.000470779
9.56259		0.968802				9.88498		-0.000456483
9.56786		0.965524				9.93761		-0.000451554
9.57312		0.962166				9.99024		-0.000444416
9.57838		0.95873				10.0429		-0.000369554
9.58365		0.955232				10.0955		-0.000308362
9.58891		0.951638				10.1481		-0.000354595
9.59417		0.947917				10.2008		-0.000444833
9.59943		0.944048				10.2534		-0.000595504
9.6047		0.939993				10.306		-0.000659367
9.60996		0.935772				10.3587		-0.000667651
9.61522		0.931406				10.4113		-0.000474784
9.62049		0.926868				10.4639		-0.000311408
9.62575		0.922326				10.5253		-0.000292946
9.63101		0.917862				10.578		-0.000237538
9.63628		0.913331				10.6306		-0.000234835
9.64154		0.908733				10.6832		-0.000339077
9.6468		0.904097				10.7359		-0.000388312
9.65207		0.899362				10.7885		-0.000367345
9.65733		0.894502				10.8411		-0.000279903
9.66259		0.889587				10.8938		-0.000238461
9.66786		0.884622				10.9464		-0.000230889
9.67312		0.879612				10.999		-0.000161444
9.67838		0.874566				11.0517		-8.85207e-05
9.68365		0.869561				11.1043		0.000114661
9.68891		0.864611				11.1569		0.000295329
9.69417		0.859657				11.2095		0.000357671
9.69944		0.854712				11.2622		0.000429175
9.7047		0.849744				11.3148		0.000414177
9.70996		0.844739				11.3674		0.000412224
9.71523		0.839635				11.4201		0.000434604
9.72049		0.834442				11.4727		0.000366642
9.72575		0.829245				11.5253		0.000415746
9.73101		0.824097				11.578		0.00044624
9.73628		0.818976				11.6306		0.000559219
9.74154		0.81389				11.6832		0.000612177
9.7468		0.808856				11.7359		0.000714455
9.75207		0.803821				11.7885		0.00094516
9.75733		0.798792				11.8499		0.00113778
9.76259		0.793762				11.8674		0.00118128
9.76786		0.788681				11.9025		0.00122706
9.77312		0.783523				11.9552		0.00135292
9.77838		0.778327				12.0078		0.00140334
9.78365		0.773151				12.0604		0.00158319
9.78891		0.768059				12.1131		0.00185279
9.79417		0.763073				12.1657		0.0023157
9.79944		0.758151				12.2183		0.00305557
9.8047		0.753248				12.271		0.00393385
9.80996		0.748321				12.2885		0.00429035
9.81523		0.743381				12.3236		0.00508157
9.82049		0.738423				12.3762		0.00627046
9.82575		0.733447				12.4113		0.00719053
9.83102		0.728517				12.4289		0.00767685
9.83628		0.723617				12.4815		0.00962546
9.84154		0.718746				12.499		0.0102626
9.84681		0.713923				12.5341		0.0115237
9.85207		0.709154				12.578		0.0132241
9.85733		0.704435				12.5868		0.013546
9.86259		0.699671				12.6394		0.0156829
9.86786		0.694722				12.6482		0.0160849
9.87312		0.689691				12.692		0.0182374
9.87838		0.684788				12.7096		0.0190973
9.88365		0.680011				12.7446		0.0208731
9.88891		0.675284				12.771		0.0221442
9.89417		0.670636				12.7973		0.0234512
9.89944		0.66624				12.8236		0.0248269
9.9047		0.662045				12.8499		0.0261838
9.90996		0.657743				12.885		0.0280138
9.91523		0.653341				12.9025		0.0289106
9.92049		0.648949				12.9376		0.0307827
9.92575		0.644593				12.9552		0.0316899
9.93102		0.640231				12.999		0.0340017
9.93628		0.635866				13.0078		0.0344849
9.94154		0.631532				13.0517		0.036763
9.94681		0.627223				13.0604		0.0371895
9.95207		0.622996				13.1131		0.0397012
9.95733		0.61881				13.1745		0.0423725
9.9626		0.614628				13.1832		0.0427641
9.96786		0.610453				13.2271		0.0446213
9.97312		0.606296				13.2534		0.0456965
9.97839		0.602129				13.2797		0.0467532
9.98365		0.597952				13.3236		0.0484137
9.98891		0.593781				13.3324		0.0487436
9.99417		0.589615				13.385		0.0506498
9.99944		0.585476				13.4113		0.0514869
10.0047		0.581396				13.4376		0.0523037
10.01		0.577383				13.4903		0.0538577
10.0152		0.573394				13.5078		0.0543029
10.0205		0.569446				13.5429		0.0551736
10.0258		0.565545				13.5955		0.0562036
10.031		0.56161				13.6482		0.0570873
10.0363		0.557633				13.6657		0.0573533
10.0415		0.55367				13.7008		0.0578621
10.0468		0.54971				13.7534		0.0585019
10.0521		0.54576				13.8061		0.0589501
10.0573		0.541866				13.8587		0.0593397
10.0626		0.537997				13.9113		0.0595923
10.0679		0.534125				13.964		0.0596223
10.0731		0.530287				14.0166		0.0596126
10.0784		0.526476				14.0692		0.0595305
10.0836		0.522634				14.1219		0.0592858
10.0889		0.518756				14.1745		0.0589879
10.0942		0.514889				14.2271		0.0586586
10.0994		0.511025				14.2797		0.0582808
10.1047		0.507182				14.3324		0.0578293
10.11		0.503384				14.385		0.0572756
10.1152		0.499586				14.3938		0.0571764
10.1205		0.49579				14.4376		0.0566704
10.1258		0.49207				14.499		0.0559236
10.131		0.48842				14.5517		0.0553598
10.1363		0.484799				14.6043		0.054782
10.1415		0.481181				14.6482		0.0541921
10.1468		0.477559				14.6569		0.0540657
10.1521		0.473905				14.7096		0.0532879
10.1573		0.470138				14.7622		0.0525315
10.1626		0.466409				14.8148		0.0518371
10.1679		0.462806				14.8587		0.0513028
10.1731		0.459224				14.8675		0.0511988
10.1784		0.455685				14.9201		0.0505762
10.1836		0.452198				14.9727		0.0499709
10.1889		0.448705				15.0254		0.0492802
10.1942		0.445177				15.078		0.0485675
10.1994		0.44166				15.0955		0.0483422
10.2047		0.43814				15.1306		0.0479199
10.21		0.434613				15.1833		0.0472568
10.2152		0.431127				15.2359		0.0467056
10.2205		0.427655				15.2885		0.0461545
10.2258		0.424224				15.3412		0.0456744
10.231		0.420855				15.3675		0.0454318
10.2363		0.417496				15.3938		0.0451406
10.2415		0.414147				15.4464		0.0443519
10.2468		0.410823				15.4991		0.0436292
10.2521		0.407522				15.5517		0.0430874
10.2573		0.404224				15.6043		0.0425311
10.2626		0.400916				15.6131		0.0424325
10.2679		0.397651				15.657		0.0419596
10.2731		0.394419				15.7096		0.0412622
10.2784		0.391186				15.7622		0.0406084
10.2837		0.388008				15.8236		0.0397653
10.2889		0.384892				15.8412		0.0395112
10.2942		0.38176				15.8763		0.0390005
10.2994		0.378642				15.9289		0.0383931
10.3047		0.375563				15.9815		0.037812
10.31		0.372461				16.0341		0.0373073
10.3152		0.369353				16.0868		0.0368857
10.3205		0.366285				16.1306		0.0365791
10.3258		0.363245				16.1394		0.0365268
10.331		0.360223				16.192		0.0362775
10.3363		0.357255				16.2447		0.0359184
10.3415		0.354345				16.2973		0.0355329
10.3468		0.351468				16.3499		0.0351832
10.3521		0.34859				16.4026		0.0348835
10.3573		0.345726				16.4552		0.034596
10.3626		0.342841				16.5078		0.03424
10.3679		0.339906				16.5605		0.0340286
10.3731		0.337017				16.6131		0.03387
10.3784		0.334149				16.6482		0.033621
10.3837		0.331262				16.6657		0.0334707
10.3889		0.328478				16.7184		0.0330632
10.3942		0.325758				16.771		0.0326987
10.3994		0.323043				16.8236		0.0323619
10.4047		0.320354				16.8763		0.0319935
10.41		0.317667				16.9289		0.0314588
10.4152		0.314982				16.9815		0.030922
10.4205		0.312317				17.0078		0.0306213
10.431		0.307095				17.0342		0.0303946
10.4363		0.304524				17.0868		0.0299301
10.4415		0.302008				17.1482		0.0293882
10.4468		0.299576				17.2008		0.0290045
10.4521		0.297182				17.2535		0.028787
10.4573		0.294762				17.3061		0.0286362
10.4626		0.292375				17.3587		0.0285541
10.4679		0.289997				17.4114		0.0286187
10.4731		0.287572				17.464		0.0288408
10.4784		0.285187				17.5166		0.0293039
10.4837		0.282824				17.5692		0.029906
10.4889		0.280467				17.6219		0.0306563
10.4994		0.275916				17.6307		0.0307994
10.5047		0.273739				17.6745		0.0316455
10.51		0.271566				17.7271		0.03274
10.5205		0.267275				17.771		0.0337996
10.5258		0.265081				17.7798		0.034012
10.531		0.262889				17.8324		0.035396
10.5415		0.258538				17.8763		0.0365978
10.5468		0.256415				17.885		0.0368242
10.5521		0.254373				17.9377		0.0382649
10.5626		0.250321				17.9903		0.0396449
10.5679		0.248335				18.0429		0.0411572
[truncated: 1,301 more rows]

## Sheet: Fig. S6
Chemotaxis assays
Raw values										Normalized values
	WT		WT		1492		1492			WT		WT		1492		1492
	0.5 mM Hemin-WT		0.5 mM Glucose-WT		0.5 mM Hemin-MT		0.5 mM Glucose-MT			0.5 mM Hemin-WT		0.5 mM Glucose-WT		0.5 mM Hemin-MT		0.5 mM Glucose-MT
	non Gradi	Gradient	NG	G	NG	G	NG	G		NG-WT-He	G-WT-He	NG-WT-Gl	G-WT-Gl	NG-MT-He	G-MT-He	NG-MT-Gl	G-MT-Gl
cells/ml	6000000	20000000	3500000	6500000	250000	6500000	1500000	4500000		1	3.26531	1	2.26087	1	4.0625	1	2.8125
	5000000	25000000	2500000	7500000	250000	5500000	1500000	5000000		1	4.08163	1	2.6087	1	3.4375	1	3.125
	7500000	25000000	3500000	10000000	150000	5500000	2000000	4000000		1	4.08163	1	3.47826	1	3.4375	1	2.5
	6000000	20000000	2000000	8500000	100000	7500000	1500000	5500000		1	3.26531	1	2.95652	1	4.6875	1	3.4375
		20000000		8000000		5500000	1500000	5000000		1	3.26531	1	2.78261	1	3.4375	1	3.125
Average	6125000	22000000	2875000	8100000	187500	6100000	1600000	4800000		1	3.59184	1	2.81739	1	3.8125	1	3
STDEV	1.03078e+06	2.73861e+06	750000	1.29422e+06	75000	894427	223607	570088		0	0.44712	0	0.450163	0	0.559017	0	0.356305
SEM	515388	1.36931e+06	375000	647109	33541	447214	111803	285044		0	0.199958	0	0.201319	0	0.25	0	0.159344
	Normalized values									Normalized values
	NG-WT-He	G-WT-He	NG-MT-He	G-MT-He						NG-WT-Gl	G-WT-Gl	NG-MT-Gl	G-MT-Gl
	1	3.26531	1	4.0625						1	2.26087	1	2.8125
	1	4.08163	1	3.4375						1	2.6087	1	3.125
	1	4.08163	1	3.4375						1	3.47826	1	2.5
	1	3.26531	1	4.6875						1	2.95652	1	3.4375
	1	3.26531	1	3.4375						1	2.78261	1	3.125

## Sheet: Table S1A
Treponema denticola array angle measurements
Wild type			2498			2498-2496
Tilt series	Measured angle		Tilt series	Measured angle		Tilt series	Measured angle
ts2	0		ts1	11.31		ts3	9.94
ts3	9.4		ts2	9.64		ts4	10.2
ts10 (cell 1)	12.6		ts8	11.34		ts6	17.94
ts10 (cell 2)	10.3		ts11	7.41		ts7	7.79
ts12	0		ts12	11.49		ts8	11
ts14	0		ts13	0		ts11	29.67
ts15	8.39		ts15	29.49		ts15	10.92
ts19	19.88		ts22	0		ts20	0
ts23	26.5		ts36	5.3
Average	9.67444		Average	9.55333		Average	12.1825
STDEV	9.21081		STDEV	8.7516		STDEV	8.60747
	Combined average	10.4042
	STDEV	8.59457

## Sheet: Table S1B
Vibrio cholerae inner membrane curvature
	point 20-22	point 21-23	point 22-24	point 23-25	point 24-26	point 25-27	point 26-28	point 27-29	point 28-30	point 29-31	point 30-32	point 31-33	point 32-34	point 33-35
cell 1	2.12857	6.52742	3.51741	5.16796	3.57015	3.56506	2.82087	2.62261	9.19963	27.933	13.0378	0.722804	1.2832	4.19815	Cell 1	6.1639	average
cell 2	33.1126	10.627	4.995	5.07872	34.369	4.34783									Cell 2	15.4217	average
cell 3	14.1643														Cell 3	14.1643	average
cell 4	6.98812	3.6049	5.51268	9.57854	0.69483	5.18941	1.99084	8.45309	1.81094	11.1857	13.7363	12.5628	3.71195	18.7266	Cell 4	7.41048	average
cell 5	6.87758	3.24254	0.760572	8.52515	7.27802	5.43774	0.71144	5.26316	0.548035						Cell 5	4.2938	average
cell 6	12.0627	2.67308	1.24378	0.188818	3.37041	14.1643	10.0806	16.0514							Cell 6	7.47939	average
															Combined average	9.15559
															STDEV	4.53417

## Sheet: Table S1C
Treponema denticola inner membrane curvature
	left side 1-3	left side 2-4	left side 3-5	left side 4-6	left side 5-7	left side 6-8	left side 7-9	left side 8-10	left side 9-11	left side 10-12	left side 11-13	Right side 1-3	Right side 2-4	Right side 3-5	Right side 4-6	Right side 5-7	Right side 6-8	Right side 7-9	Right side 8-10	Right side 9-11	Baseplate left-side 6-10
Cell 1	6.58107	5.10465	3.43053	32.3729	17.331	31.0559	30.3951	43.6681	27.4725	9.90099	1.23233	6.58328	15.4083	37.8788	5.60538	37.7358	17.5439	40	16.9492	21.645	49.7265
	left side 1-3	left side 2-4	left side 3-5	left side 4-6	left side 5-7	left side 6-8	left side 7-9	Right side 1-3	Right side 2-4	Right side 3-5	Right side 4-6	Right side 5-7	Right side 6-8	Right side 7-9	Baseplate right side 3-6
Cell 2	11.2227	34.2583	20.0401	31.746	17.2414	23.0415	12.1655	27.933	13.245	24.5098	26.3296	22.3214	26.6667	18.7266	54.0541
	left side 1-3	left side 2-4	left side 3-5	left side 4-6	left side 5-7	left side 6-8	left side 7-9	left side 8-10	Right side 1-3	Right side 2-4	Right side 3-5	Right side 4-6	Right side 5-7	Right side 6-8	Right side 7-9	Baseplate left side 2-5
Cell 3	3.59971	39.557	27.9642	42.4989	26.8025	29.2483	26.9687	12.6167	15.7456	43.7254	27.6932	28.9017	25.1889	37.8788	8.96057	63.6943
	left side 1-3	left side 2-4	left side 3-5	left side 4-6	left side 5-7	left side 6-8	left side 7-9	Right side	Right side 1-3	Right side 2-4	Right side 3-5	Right side 4-6	Right side 5-7	Baseplate right side 3-6
Cell 4	0.230803	38.7597	46.5116	46.2963	40.1606	17.094	13.5648	28.6041	38.4763	40.7498	50.5817	35.5872	30.9598	96.1538
	left side 1-3	left side 2-4	left side 3-5	left side 4-6	left side 5-7	left side 6-8	left side 7-9	Right side	Right side 1-3	Right side 2-4	Right side 3-5	Right side 4-6	Right side 5-7	Right side 6-8	Baseplate right side 4-7
Cell 5	15.3752	24.2718	7.19942	30.03	72.5689	17.8253	4.3535	18.1324	20.8768	17.4764	28.8434	60.423	1.27259	23.0362	99.7009
	left side 1-3	left side 2-4	left side 3-5	left side 4-6	left side 5-7	left side 6-8	left side 7-9	left side 8-10	Right side 1-3	Right side 2-4	Right side 3-5	Right side 4-6	Right side 5-7	Right side 6-8	Right side 7-9	Baseplate left side 4-6
Cell 6	17.301	27.933	24.6305	41.1523	39.3701	13.21	23.6967	12.3916	23.9234	38.9105	23.8663	20.1613	47.1698	27.933	4.87567	55.7103
	left side 1-3	left side 2-4	left side 3-5	left side 4-6	left side 5-7	left side 6-8	left side 7-9	left side 8-10	Right side 1-3	Right side 2-4	Right side 3-5	Right side 4-6	Right side 5-7	Right side 6-8	Right side 7-9	Baseplate right side 4-7
Cell 7	24.0964	14.5773	29.8507	26.5252	22.5225	30.9598	23.2019	36.4964	19.0476	6.36618	28.5225	39.5257	39.6825	19.1205	-2.54453	74.6269
	left side 1-3	left side 2-4	left side 3-5	left side 4-6	left side 5-7	left side 6-8	left side 7-9	Right side 1-3	Right side 2-4	Right side 3-5	Right side 4-6	Right side 5-7	Baseplate left side 3-6
Cell 8	21.097	25.3165	26.3505	39.9361	25.8398	10.6157	-7.94218	22.6963	22.1337	49.2611	2.81136	8.58369	47.7555
	left side 1-3	left side 2-4	left side 3-5	left side 4-6	left side 5-7	left side 6-8	left side 7-9	Right side	Right side 1-3	Right side 2-4	Right side 3-5	Right side 4-6	Right side 5-7	Baseplate left side 3-6
Cell 9	11.0497	10.5374	42.3729	50	19.8689	20.5002	17.34	15.3139	36.8189	35.791	25.6016	17.2444	20.6612	47.8469
	left side 1-3	left side 2-4	left side 3-5	left side 4-6	left side 5-7	left side 6-8	left side 7-9	Right side	Right side 1-3	Right side 2-4	Right side 3-5	Right side 4-6	Right side 5-7	Right side 6-8	Baseplate right side 4-7
Cell 10	6.84463	27.1739	26.5252	26.738	26.3366	34.6021	20.7039	6.58025	36.2319	29.036	32.9489	32.9707	25.208	14.1303	67.0691
						Average
cell 1	31.0559	30.3951	43.6681			35.0397
cell2	24.5098	26.3296				25.4197
cell 3	39.557	27.9642	42.4989	26.8025		34.2056
cell 4	50.5817	35.5872				43.0844
cell 5	60.423	1.27259				30.8478
cell 6	41.1523					41.1523
cell 7	39.5257	39.6825				39.6041
cell 8	26.3505	39.9361				33.1433
cell 9	42.3729	50				46.1864
cell 10	32.9707	25.208				29.0893
				Combined average		35.7773
				STDEV		6.59579
				radius (A)		0.0279507
				radius (nm)		27nm
Treponema denticola baseplate curvature
	left side 1-3	left side 2-4	left side 3-5	left side 4-6	left side 5-7	left side 6-8	left side 7-9	left side 8-10	left side 9-11	left side 10-12	left side 11-13	Right side 1-3	Right side 2-4	Right side 3-5	Right side 4-6	Right side 5-7	Right side 6-8	Right side 7-9	Right side 8-10	Right side 9-11	Baseplate left-side 6-10
Cell 1	6.58107	5.10465	3.43053	32.3729	17.331	31.0559	30.3951	43.6681	27.4725	9.90099	1.23233	6.58328	15.4083	37.8788	5.60538	37.7358	17.5439	40	16.9492	21.645	49.7265
	left side 1-3	left side 2-4	left side 3-5	left side 4-6	left side 5-7	left side 6-8	left side 7-9	Right side 1-3	Right side 2-4	Right side 3-5	Right side 4-6	Right side 5-7	Right side 6-8	Right side 7-9	Baseplate right side 3-6
Cell 2	11.2227	34.2583	20.0401	31.746	17.2414	23.0415	12.1655	27.933	13.245	24.5098	26.3296	22.3214	26.6667	18.7266	54.0541
	left side 1-3	left side 2-4	left side 3-5	left side 4-6	left side 5-7	left side 6-8	left side 7-9	left side 8-10	Right side 1-3	Right side 2-4	Right side 3-5	Right side 4-6	Right side 5-7	Right side 6-8	Right side 7-9	Baseplate left side 2-5
Cell 3	3.59971	39.557	27.9642	42.4989	26.8025	29.2483	26.9687	12.6167	15.7456	43.7254	27.6932	28.9017	25.1889	37.8788	8.96057	63.6943
	left side 1-3	left side 2-4	left side 3-5	left side 4-6	left side 5-7	left side 6-8	left side 7-9	Right side	Right side 1-3	Right side 2-4	Right side 3-5	Right side 4-6	Right side 5-7	Baseplate right side 3-6
Cell 4	0.230803	38.7597	46.5116	46.2963	40.1606	17.094	13.5648	28.6041	38.4763	40.7498	50.5817	35.5872	30.9598	96.1538
	left side 1-3	left side 2-4	left side 3-5	left side 4-6	left side 5-7	left side 6-8	left side 7-9	Right side	Right side 1-3	Right side 2-4	Right side 3-5	Right side 4-6	Right side 5-7	Right side 6-8	Baseplate right side 4-7
Cell 5	15.3752	24.2718	7.19942	30.03	72.5689	17.8253	4.3535	18.1324	20.8768	17.4764	28.8434	60.423	1.27259	23.0362	99.7009
	left side 1-3	left side 2-4	left side 3-5	left side 4-6	left side 5-7	left side 6-8	left side 7-9	left side 8-10	Right side 1-3	Right side 2-4	Right side 3-5	Right side 4-6	Right side 5-7	Right side 6-8	Right side 7-9	Baseplate left side 4-6
Cell 6	17.301	27.933	24.6305	41.1523	39.3701	13.21	23.6967	12.3916	23.9234	38.9105	23.8663	20.1613	47.1698	27.933	4.87567	55.7103
	left side 1-3	left side 2-4	left side 3-5	left side 4-6	left side 5-7	left side 6-8	left side 7-9	left side 8-10	Right side 1-3	Right side 2-4	Right side 3-5	Right side 4-6	Right side 5-7	Right side 6-8	Right side 7-9	Baseplate right side 4-7
Cell 7	24.0964	14.5773	29.8507	26.5252	22.5225	30.9598	23.2019	36.4964	19.0476	6.36618	28.5225	39.5257	39.6825	19.1205	-2.54453	74.6269
	left side 1-3	left side 2-4	left side 3-5	left side 4-6	left side 5-7	left side 6-8	left side 7-9	Right side 1-3	Right side 2-4	Right side 3-5	Right side 4-6	Right side 5-7	Baseplate left side 3-6
Cell 8	21.097	25.3165	26.3505	39.9361	25.8398	10.6157	-7.94218	22.6963	22.1337	49.2611	2.81136	8.58369	47.7555
	left side 1-3	left side 2-4	left side 3-5	left side 4-6	left side 5-7	left side 6-8	left side 7-9	Right side	Right side 1-3	Right side 2-4	Right side 3-5	Right side 4-6	Right side 5-7	Baseplate left side 3-6
Cell 9	11.0497	10.5374	42.3729	50	19.8689	20.5002	17.34	15.3139	36.8189	35.791	25.6016	17.2444	20.6612	47.8469
	left side 1-3	left side 2-4	left side 3-5	left side 4-6	left side 5-7	left side 6-8	left side 7-9	Right side	Right side 1-3	Right side 2-4	Right side 3-5	Right side 4-6	Right side 5-7	Right side 6-8	Baseplate right side 4-7
Cell 10	6.84463	27.1739	26.5252	26.738	26.3366	34.6021	20.7039	6.58025	36.2319	29.036	32.9489	32.9707	25.208	14.1303	67.0691
	Baseplate values
	cell 1	49.7265
	cell2	54.0541
	cell 3	63.6943
	cell 4	96.1538
	cell 5	99.7009
	cell 6	55.7103
	cell 7	74.6269
	cell 8	47.7555
	cell 9	47.8469
	cell 10	67.0691
	Average	65.6338
	STDEV	19.1496
	radius	0.0152 um
	radius	15.2 nm
	radius	152 angstroms
